# Supplementary material for: Intracellular complexities of acquiring a new enzymatic function revealed by mass-randomisation of active-site residues
Source: eLife. 2020 Nov 13;9:e59081. doi: 10.7554/eLife.59081 (PMC7738182; doi:10.7554/eLife.59081)
Supplement: Figure 1—source data 1. [file elife-59081-fig1-data1.xlsx]

## Sheet: Fig 1C
	NfsA_Ec Variant	S41	L43	H215	T219	K222	S224	R225	F227
	36_37	Y	L	C	Y	V	R	V	G
	20_39	Y	L	N	Y	R	Y	D	H
	36_3	H	S	G	Y	V	H	C	H
	19_22	Y	S	V	F	Q	N	N	R
	37_4	Y	S	G	F	M	H	C	H
	35_58	Y	Y	N	L	E	R	D	H
	22_8	F	C	G	F	R	N	N	H
	36_51	Y	V	N	Y	A	N	G	D
	35_45	Y	V	G	Y	V	H	V	G
	21_17	Y	V	G	Y	A	Y	C	D
	36_6	F	V	F	H	R	D	F	D
	21_22	Y	V	G	F	E	R	N	D
	37_5	Y	C	D	F	L	V	N	G
	19_49	Y	L	D	F	K	I	S	G
	22_4	Y	S	N	F	A	I	N	Y
	36_15	F	L	V	Y	A	H	V	H
	37_18	Y	L	D	L	T	R	N	L
	36_22	Y	C	D	F	K	I	C	D
	20_48	Y	L	D	Y	R	F	N	L
	20_5	Y	C	F	F	Q	H	C	C
	36_42	Y	V	G	Y	T	R	C	D
	36_17	Y	V	D	F	L	V	N	F
	35_38	F	C	H	F	T	S	I	D
	36_38	F	L	D	F	V	R	N	G
	36_29	Y	C	F	F	V	S	C	F
	21_49	Y	C	H	Y	E	N	V	G
	36_47	Y	C	H	Y	A	D	V	S
	21_24	F	S	I	F	E	R	V	G
	35_44	Y	L	I	L	G	L	L	D
	36_41	F	L	Y	F	T	Y	N	Y
	NfsA_Ec	S	L	H	T	K	S	R	F
		Amino Acid Residue Count
	H	1	0	4	1	0	5	0	6
	G	0	0	7	0	1	0	1	7
	V	0	7	2	0	5	2	6	0
	D	0	0	7	0	0	2	2	8
	F	7	0	3	15	0	1	1	3
	Y	22	1	1	11	0	3	0	2
	A	0	0	0	0	5	0	0	0
	L	0	10	0	3	2	1	1	2
Amino acid	M	0	0	0	0	1	0	0	0
Residue	I	0	0	2	0	0	3	1	0
Count	S	1	5	0	0	0	3	1	1
	T	0	0	0	1	4	0	0	0
	C	0	8	1	0	0	0	7	1
	P	0	0	0	0	0	0	0	0
	N	0	0	4	0	0	4	10	0
	Q	0	0	0	0	2	0	0	0
	E	0	0	0	0	4	0	0	0
	K	0	0	0	0	3	0	0	0
	W	0	0	0	0	0	0	0	0
	R	0	0	0	0	4	7	1	1
		S41	L43	H215	T219	K222	S224	R225	F227
	Non-polar	0	16	11	3	14	6	9	9
	Polar	0	13	5	0	6	6	18	2
Raw	Acidic	0	0	7	0	4	2	2	8
Count	Basic	1	0	3	1	6	12	0	7
	Aromatic	29	1	4	26	0	4	1	4
		30	30	30	30	30	30	30	30
		S41	L43	H215	T219	K222	S224	R225	F227
	Non-polar	0	53.3333	36.6667	10	46.6667	20	30	30
	Polar	0	43.3333	16.6667	0	20	20	60	6.66667
Percentage	Acidic	0	0	23.3333	0	13.3333	6.66667	6.66667	26.6667
	Basic	3.33333	0	10	3.33333	20	40	0	23.3333
	Aromatic	96.6667	3.33333	13.3333	86.6667	0	13.3333	3.33333	13.3333

## Sheet: Fig 1D
		Repeat 1	Repeat 2	Repeat 3	Repeat 4	Repeat 5	Average EC50	StDev
	36_37	31.4	44.6	53.3	38.7	43.4	42.28	8.0509
	20_39	45.9	31.8	46.1	37.2	38.1	39.82	6.1349
	36_3	38.8788	52.1	30.5	35.2	39.2	39.1758	8.03431
	37_4	40	42.6	44.3	31.2	33.7	38.36	5.67741
	19_22	45.8	34.5	35.5	37.2	37	38	4.49944
	35_58	34.5	42.5	44.2	34.3	30.2	37.14	5.9534
	22_8	30.4	40	37.6	40.2	34.4	36.52	4.14632
	36_51	34.1	39.2	34.7	33.9	43	36.98	4.00462
	35_45	34.8	40.5	36	35.1		36.6	2.64953
	21_17	33.5	27.3	47.2	37.7		36.425	8.35758
	36_6	40.1797	37.2	45.8	21.6		36.1949	10.3627
	22_4	36.8	33.6	41.4	31		35.7	4.47958
	21_22	27.4	36.6	38.9	39.6		35.625	5.63109
	36_15	31.4	37.5	44.5	28.1		35.375	7.22282
	19_49	34.4	32.8	42.3	31.9		35.35	4.74728
	37_18	30.6	33.4	41.4	33.6		34.75	4.64004
	20_48	30.8	30	38.5	38.1		34.35	4.57566
	37_5	29.1	33.2	43.6	30.7		34.15	6.52201
	20_5	27.8	30.4	37.3	40		33.875	5.72211
	36_22	27.9917	29.8	39	35.3		33.0229	5.0534
	35_38	38.5	24.4	34.3	31.2		32.1	5.94138
	36_17	23.6	34.3	36.8	32.9		31.9	5.76368
	36_42	20.9	42.3	30.4	32		31.4	8.76394
	36_38	34.3	24.7	36.2	26.5		30.425	5.67296
	36_29	26.9	27.4	34.9	30.2		29.85	3.66652
	21_24	24.9	34	30.6	29.1		29.65	3.77227
	21_49	24.9	23.4	37.7	30		29	6.45136
	36_47	27.5	29.8	25.9	24.9		27.025	2.13756
	35_44	21.6	26.2	33.3	26.4		26.875	4.82312
	36_41	21.5	28.6	26.3	15.5		22.975	5.79504
