# Supplementary material for: Intracellular complexities of acquiring a new enzymatic function revealed by mass-randomisation of active-site residues
Source: eLife. 2020 Nov 13;9:e59081. doi: 10.7554/eLife.59081 (PMC7738182; doi:10.7554/eLife.59081)
Supplement: Figure 2—source data 1. [file elife-59081-fig2-data1.xlsx]

## Sheet: Fig 2D
	Variant	Repeat 1	Repeat 2	Repeat 3	Repeat 4	Repeat 5	Repeat 6	Repeat 7	Repeat 8	# Mutations	Average EC50	StDev	%StDev
	1_SHTKSRG	2.00109	4.3	4.3	3.4	4.2				1	3.64022	0.991012	27.224
	3_SHTKSVF	15.4798	14.2	9.9	15.3	11.2	12.9			1	13.1633	2.26184	17.1829
	5_SHTKRRF	2.34514	2.3	1.9	2.2					1	2.18628	0.20026	9.15983
	9_SHTVSRF	5.46852	5	3.7	4.2					1	4.59213	0.79248	17.2573
	32_SCTKSRF	4.13193	3.8	3.3	3.6					1	3.70798	0.349431	9.42376
	118_YHTKSRF	5.26819	6.2	5	3.8					1	5.06705	0.988929	19.5169
	119_SHYKSRF	4.7007	4.8	4.2	3.3					1	4.25018	0.685719	16.1339
	2_SHTKSVG	17.503	14	20.9	17					2	17.3508	2.82671	16.2916
	4_SHTKRRG	2.13315	2.4	1.8	2.6					2	2.23329	0.346428	15.512
	7_SHTKRVF	15.9478	12.7	13.4	13.9					2	13.987	1.39683	9.98665
	8_SHTVSRG	8.92481	6.7	7.2	5.4					2	7.0562	1.45857	20.6707
	11_SHTVSVF	14.8927	14.2	10.5	12.8					2	13.0982	1.93853	14.8
	13_SHTVRRF	2.85605	3.5	2.9	3.3					2	3.13901	0.312741	9.96304
	16_SHYKSRG	5.24405	4.6	4.6	3.2					2	4.41101	0.862543	19.5543
	18_SHYKSVF	12.2965	15.8	10.2	12.4					2	12.6741	2.31733	18.284
	20_SHYKRRF	2.82625	4	3.4	3.6					2	3.45656	0.488669	14.1374
	24_SHYVSRF	6.35046	6	6.1	4.2					2	5.66261	0.986155	17.4152
	31_SCTKSRG	6.92201	6.4	6.4	4.6					2	6.0805	1.01721	16.7291
	34_SCTKSVF	1.97715	2.6	2	1.6					2	2.04429	0.413391	20.2218
	36_SCTKRRF	2.22599	2.9	2.3	2.4					2	2.4565	0.304146	12.3813
	40_SCTVSRF	3.39291	3.9	4.4	3					2	3.67323	0.60867	16.5704
	48_SCYKSRF	3.65812	4.6	4.9	3.7					2	4.21453	0.630553	14.9614
	62_YHTKSRG	1.3	1.9	1.4	1.6					2	1.55	0.264575	17.0694
	64_YHTKSVF	22.7962	18.7	22.2	20.6	18.3	20			2	20.4327	1.81523	8.88393
	66_YHTKRRF	2.63721	3.1	2.8	2.7					2	2.8093	0.205065	7.2995
	70_YHTVSRF	5.6474	7.1	7.1	6.5					2	6.58685	0.687205	10.433
	78_YHYKSRF	4.8	6.6	4.9	5.2					2	5.375	0.834166	15.5194
	93_YCTKSRF	5.3	5.4	5.3	5.3					2	5.325	0.05	0.938967
	6_SHTKRVG	12.218	11.8	7.7	8.9					3	10.1545	2.20332	21.698
	10_SHTVSVG	21.3555	19.1	18.3	19.9					3	19.6639	1.30325	6.62766
	12_SHTVRRG	3.45046	4.2	3.5	3.8					3	3.73761	0.344777	9.22451
	15_SHTVRVF	15.8392	14.7	14.63	15.1					3	15.0673	0.554675	3.68132
	17_SHYKSVG	13.2076	17.3	10.5	14.6					3	13.9019	2.83369	20.3835
	19_SHYKRRG	3.10563	4.4	3.7	3.8					3	3.75141	0.53	14.128
	22_SHYKRVF	27.7347	20.4	23.2	17.9					3	22.3087	4.21567	18.897
	23_SHYVSRG	7.78792	8.5	7.8	6.6					3	7.67198	0.788372	10.276
	26_SHYVSVF	16.8356	14.6	9.6	12.1	14				3	13.4271	2.72625	20.3041
	28_SHYVRRF	4.62261	6.6	6.1	4.8					3	5.53065	0.970575	17.549
	33_SCTKSVG	15.1026	14.2	11.7	11.9					3	13.2256	1.6889	12.7699
	35_SCTKRRG	2.60289	3.4	2.2	2.9					3	2.77572	0.505468	18.2103
	38_SCTKRVF	3.32606	3.5	3.3	3.4					3	3.38151	0.0896301	2.65059
	39_SCTVSRG	5.78171	7.5	6.4	6					3	6.42043	0.763895	11.8979
	42_SCTVSVF	2.00284	2	1.7	1.7					3	1.85071	0.174029	9.40338
	44_SCTVRRF	2.55193	3.6	2.9	2.8					3	2.96298	0.449178	15.1597
	47_SCYKSRG	3.32775	5	5	3.7					3	4.25694	0.871369	20.4694
	50_SCYKSVF	5.09539	5	3.5	5					3	4.64885	0.767217	16.5034
	52_SCYKRRF	2.38898	3.6	3	3.2					3	3.04724	0.504784	16.5653
	56_SCYVSRF	3.05648	4.1	4.2	3.2					3	3.63912	0.594221	16.3287
	63_YHTKSVG	27.3787	23.8	27.3	28.6	19.7	17.8			3	24.0965	4.48063	18.5945
	65_YHTKRRG	3.90972	4.2	4.5	4.2					3	4.20243	0.240999	5.73476
	68_YHTKRVF	22.7687	21.2	21.7	25.9					3	22.8922	2.10926	9.21391
	69_YHTVSRG	8.87824	11.1	9.5	9.4					3	9.71956	0.959819	9.87512
	72_YHTVSVF	23	23	28	23					3	24.25	2.5	10.3093
	74_YHTVRRF	2.01593	2.4	1.8	2.8					3	2.25398	0.44054	19.5449
	77_YHYKSRG	7.38802	9.8	7.3	8.7					3	8.29701	1.18907	14.3313
	80_YHYKSVF	31.0623	29.2	35.2	34.4	26.6	25.2			3	30.277	4.05729	13.4005
	82_YHYKRRF	2.53458	3.7	2.8	3.5					3	3.13364	0.555331	17.7216
	86_YHYVSRF	4.88387	6.7	6.7	6.1					3	6.09597	0.856137	14.0443
	92_YCTKSRG	9	7.7	9.7	9.5					3	8.975	0.899537	10.0227
	95_YCTKSVF	18.3	17.4	16.3	14.7					3	16.675	1.55	9.29535
	97_YCTKRRF	3.4	3.5	3.5	2.9					3	3.325	0.287228	8.63844
	101_YCTVSRF	7.4	8.1	7.5	6.3					3	7.325	0.75	10.2389
	108_YCYKSRF	3.6268	4.7	4.7	4.8					3	4.4567	0.555273	12.4593
	14_SHTVRVG	22.592	17.9	18.4	21.9					4	20.198	2.39037	11.8347
	21_SHYKRVG	12.1598	14.1	13.7	16.1					4	14.015	1.62228	11.5754
	25_SHYVSVG	26.5118	19.5	16.6	16.7	22.1				4	20.2824	4.15675	20.4944
	27_SHYVRRG	4.43679	5.9	5.1	4.8					4	5.0592	0.62268	12.3079
	30_SHYVRVF	21.4238	19	16.3	18.8					4	18.8809	2.09349	11.0878
	37_SCTKRVG	16.4	11.7	17	17.9					4	15.75	2.76948	17.584
	41_SCTVSVG	13.2016	14.9	8.7	9.7	11.2				4	11.5403	2.53068	21.929
	43_SCTVRRG	3.89546	3.6	3.6	3.7					4	3.69886	0.139281	3.76551
	46_SCTVRVF	2.78069	2.8	2.6	2.6					4	2.69517	0.110178	4.08799
	49_SCYKSVG	15.2853	15.4	12.1	15.8					4	14.6463	1.71182	11.6877
	51_SCYKRRG	2.8805	3.9	3.6	3.2					4	3.39512	0.447135	13.1699
	54_SCYKRVF	10.4247	14.6	12.1	12.5					4	12.4062	1.71673	13.8377
	55_SCYVSRG	5.26506	6.6	5.4	5.3					4	5.64126	0.64171	11.3753
	58_SCYVSVF	2.9168	5.4	3.1	3.1	4.1	3.9			4	3.7528	0.938794	25.0158
	60_SCYVRRF	2.7489	4.5	3.6	3.8					4	3.66223	0.720851	19.6834
	67_YHTKRVG	30.2899	22.1	21.2	26.3					4	24.9725	4.18411	16.7549
	71_YHTVSVG	15.949	17.9	16.9	19.1					4	17.4622	1.35154	7.73977
	73_YHTVRRG	3.45352	4.3	4.5	5.6					4	4.46338	0.883132	19.7862
	76_YHTVRVF	27.4841	28.5	21.7	29.1					4	26.696	3.3968	12.724
	79_YHYKSVG	46.4504	37.1	32.4	37	32.7	30.9			4	36.0917	5.67856	15.7337
	81_YHYKRRG	3.89823	4.9	4.5	5.1					4	4.59956	0.529931	11.5213
	84_YHYKRVF	16	23.9	16	21.9					4	19.45	4.06653	20.9076
	85_YHYVSRG	9.15461	10.5	8.6	11.7					4	9.98865	1.39214	13.9372
	88_YHYVSVF	22.5	29	29.9	31	23.9				4	27.26	3.80565	13.9606
	90_YHYVRRF	3.4	2.2	2.2	2.3	2.9				4	2.6	0.533854	20.5328
	94_YCTKSVG	29.1	29	29.2	29.2					4	29.125	0.0957427	0.32873
	96_YCTKRRG	3	3.5	4	3.5					4	3.5	0.408248	11.6642
	99_YCTKRVF	23.2576	22.4	24.2	18.8					4	22.1644	2.36033	10.6492
	100_YCTVSRG	10.431	9.6	13.8	9.8					4	10.9077	1.96042	17.9727
	103_YCTVSVF	21.4997	18.9	16.1	17.5					4	18.4999	2.30349	12.4513
	105_YCTVRRF	2.97142	3.6	3.6	3.6					4	3.44286	0.314288	9.1287
	107_YCYKSRG	7.35549	9.8	13.4	10.5	10.3				4	10.2711	2.15441	20.9755
	110_YCYKSVF	23.8168	18	23.6	21.3					4	21.6792	2.70426	12.474
	112_YCYKRRF	2.70955	3	3.6	2.4					4	2.92739	0.51097	17.4548
	115_YCYVSRF	3.98262	6.6	5.5	3.6	3.6	4.7			4	4.66377	1.19806	25.6887
	29_SHYVRVG	36.6916	30.7	28.5	33.1					5	32.2479	3.50788	10.8778
	45_SCTVRVG	10.2829	16.3	8	11.8	14.6	8.1	9.4		5	11.2118	3.21092	28.6387
	53_SCYKRVG	23.2571	24.8	19	27.1					5	23.5393	3.41335	14.5006
	57_SCYVSVG	13.3744	16.8	12.6	15.1					5	14.4686	1.87288	12.9444
	59_SCYVRRG	3.05372	5.6	3.7	5	6.1	2.5	3.2		5	4.16482	1.39375	33.4649
	61_SCYVRVF	9.28331	10.4	13	15.2	14.9				5	12.5567	2.64769	21.0859
	75_YHTVRVG	29.7288	28.1	23	29.4					5	27.5572	3.11846	11.3163
	83_YHYKRVG	47.3126	44.6	38	41.4	34.1	31.3			5	39.4521	6.15293	15.596
	87_YHYVSVG	26.5	38	31.6	39.8	30.6				5	33.3	5.49454	16.5001
	89_YHYVRRG	5.5	6.2	5.8	4.8					5	5.575	0.590903	10.5992
	91_YHYVRVF	47.9	43.8	43.1	39.8					5	43.65	3.32716	7.62236
	98_YCTKRVG	30.8	25.9	27.5	26.7					5	27.725	2.15155	7.76032
	102_YCTVSVG	32.6545	28.7	33.6	29					5	30.9886	2.50245	8.07537
	104_YCTVRRG	3.933	4.9	4.8	2.9	4.4				5	4.1866	0.814001	19.443
	106_YCTVRVF	24.5107	22	22.5	24.2					5	23.3027	1.23904	5.31717
	111_YCYKRRG	4.85712	5.3	6	5.9					5	5.51428	0.536182	9.72352
	113_YCYKRVF	49.6993	42.9	35.6	37.2	31.8	31.4			5	38.0999	7.06009	18.5305
	114_YCYVSRG	22.1	26	29	20.9	17.4				5	23.08	4.5152	19.5632
	116_YCYVSVF	38.3213	36.7	41.2	34					5	37.5553	3.01343	8.02398
	117_YCYVRRF	3.3485	2.7	3.5	2.4					5	2.98713	0.523065	17.5106
	124_YCYKSVG	31.7	32.3	30.1	24.8	31.1	31.5	27.4	30.4	5	29.9125	2.55088	8.52779
	120_YHYVRVG	32.299	29	39.7	41.7					6	35.6747	6.01261	16.854
	121_YCTVRVG	21.6016	26.7	38	25.5	31.2				6	28.6003	6.27132	21.9274
	122_YCYKRVG	36.307	44.4	33.8	37.2	40.7				6	38.4814	4.13029	10.7332
	123_YCYVSVG	40.9028	39.3	35.1	36.9	33.4				6	37.1206	3.04259	8.1965
	125_YCYVRRG	6.4	6.7	7.1	4.7					6	6.225	1.05633	16.9692
	126_YCYVRVF	48.2	38.7	45.3	43.4	38.6	35.3			6	41.5833	4.8495	11.6621
	129_SCYVRVG	18.7	16.5	21.5						6	18.9	2.50599	13.2592
	128_YCYVRVG (36_37)	42.7	46.9	43.9	42.4	44.2	45.5	41.9		7	43.9286	1.7951	4.0864
	127_SHTKSRF (WT NfsA)	4.5	5	5.3	5.4	5	4.9	5.6	4.7	0	4.795	0.717066	14.9545
		4.5	4.8	4.6	3.8	4.7	4.4	4.9	5.6
		5.4	6.1	3.1	3.6

## Sheet: Fig 2E
	Variant	Repeat 1	Repeat 2	Repeat 3	Repeat 4	Repeat 5	Repeat 6	Repeat 7	Repeat 8	# Mutations	Average EC50	StDev	%StDev
	113_YHTKSRF	3.56691	5.6	4.61537	5.5044					1	4.82167	0.946732	19.6349
	114_SNTKSRF	3.06481	4.45979	4.34058	4.25113					1	4.02908	0.648501	16.0955
	115_SHYKSRF	3.70759	4.7456	4.11925	4.4403					1	4.25318	0.444633	10.4541
	116_SHTRSRF	3.26802	4.72757	4.68778	4.33584					1	4.2548	0.681001	16.0055
	117_SHTKYRF	4.30352	3.95079	5.07941	3.71937					1	4.26327	0.594747	13.9505
	118_SHTKSDF	9.82998	13.9479	8.70678	11.8667	12.9	11.3	12.2		1	11.5359	1.78879	15.5063
	119_SHTKSRH	4.0795	3.78326	4.05643	3.4404					1	3.83989	0.298387	7.7707
	1_SNTKSRH	2.84559	4.38487	4.28499	3.66981					2	3.79631	0.708304	18.6577
	3_SNTKSDF	1.04219	1.38029	1.69971	1.36391					2	1.37153	0.268514	19.5777
	5_SNTKYRF	2.67496	2.15766	2.40124	2.72995					2	2.49095	0.264644	10.6242
	9_SNTRSRF	4.19168	3.3192	3.03358	4.05838					2	3.65071	0.562612	15.411
	17_SNYKSRF	3.38826	2.71337	3.45668	2.93279					2	3.12278	0.358553	11.4819
	31_SHTKSDH	15.9301	15.1273	17.2188	18.5451					2	16.7053	1.49886	8.97235
	32_SHTKYRH	4.87658	3.87537	3.69478	3.59578					2	4.01063	0.588789	14.6807
	34_SHTKYDF	6.54656	5.86352	8.07208	7.86073					2	7.08572	1.05799	14.9312
	35_SHTRSRH	3.29492	3.9	4.39364	3.95189	3				2	3.70809	0.556406	15.0052
	37_SHTRSDF	8.83913	9.076	10.0667	9.72886					2	9.42766	0.568354	6.02858
	39_SHTRYRF	4.39276	2.85288	2.87836	4.0233	3.7				2	3.56946	0.687738	19.2673
	42_SHYKSRH	2.46813	3.63903	4.02428	4.02021	3.5				2	3.53033	0.63737	18.0541
	44_SHYKSDF	11.3008	13.0071	9.70804	16.0314					2	12.5118	2.70557	21.6241
	46_SHYKYRF	3.86056	3.78215	3.43454	5.26956					2	4.0867	0.810013	19.8207
	50_SHYRSRF	4.03685	3.39423	2.71286	4.69785	4.5				2	3.86836	0.817832	21.1416
	58_YNTKSRF	4.87312	5.39008	4.74724	5.84993					2	5.2151	0.506449	9.71121
	83_YHTKSRH	3.70776	3.97481	3.83899	4.41929					2	3.98521	0.309243	7.75976
	85_YHTKSDF	15.6	17.5208	20.4927	21.2	24	14	14.2		2	18.1448	3.8457	21.1945
	87_YHTKYRF	3.07427	2.9576	2.43835	3.82779					2	3.0745	0.573236	18.6448
	91_YHTRSRF	3.48371	3.96264	3.93696	5.3528					2	4.18403	0.809632	19.3506
	99_YHYKSRF	4.06175	4.8773	4.03901	5.68258					2	4.66516	0.782368	16.7704
	2_SNTKSDH	4.85455	3.82053	5.60411	4.70397					3	4.74579	0.731755	15.419
	4_SNTKYRH	3.03608	4.6	3.63528	3.13063	4.1				3	3.7004	0.659386	17.8193
	7_SNTKYDF	1.4	1.12	1.21333	1.33333					3	1.26667	0.124603	9.83708
	8_SNTRSRH	4.13426	2.94469	4.58342	2.65852	2.5	3.4	4.6		3	3.54584	0.894225	25.219
	11_SNTRSDF	1.46667	1.40977	0.989978	1.2					3	1.2666	0.217164	17.1454
	13_SNTRYRF	2.01039	1.69515	2.32544	1.92532					3	1.98907	0.260805	13.1119
	16_SNYKSRH	2.55887	3.28855	3.08654	2.63013					3	2.89103	0.353385	12.2235
	19_SNYKSDF	4.94188	3.11957	3.65499	2.67787	3.7	3.5	3.7		3	3.61347	0.696842	19.2845
	21_SNYKYRF	3.0917	3.01391	3.65621	3.12715					3	3.22224	0.293149	9.09768
	25_SNYRSRF	2.49733	2.69983	2.54729	3.1851					3	2.73239	0.31386	11.4866
	33_SHTKYDH	12.3883	11.2721	14.5081	15.5119					3	13.4201	1.93544	14.422
	36_SHTRSDH	19.4055	15.8455	15.7932	20.1498					3	17.7985	2.30554	12.9536
	38_SHTRYRH	5.13305	4.11079	3.8074	4.20812					3	4.31484	0.571544	13.246
	41_SHTRYDF	6.77259	6.89773	5.44894	6.11871					3	6.3095	0.667691	10.5823
	43_SHYKSDH	17.2109	19.5127	15.7	11.3978	14	13.4			3	15.2036	2.89931	19.0699
	45_SHYKYRH	4.9082	4.84461	4.2	5					3	4.7382	0.364427	7.69125
	48_SHYKYDF	8.93333	9.04037	8.13333	8.62053					3	8.68189	0.406781	4.68539
	49_SHYRSRH	3.23845	3.74849	3.78134	3.30957					3	3.51946	0.285221	8.1041
	52_SHYRSDF	12.8862	9.79123	9.58137	13.9147					3	11.5434	2.18675	18.9438
	54_SHYRYRF	3.72938	3.41272	5.5	4.56794	4.8				3	4.40201	0.840035	19.083
	57_YNTKSRH	3.84618	4.83333	3.749	3.98174					3	4.10256	0.496442	12.1008
	60_YNTKSDF	10.7793	10.3156	10.2359	13.9494					3	11.32	1.76921	15.629
	62_YNTKYRF	4.28728	3.38883	2.85601	4.18461					3	3.67918	0.679994	18.4822
	66_YNTRSRF	4.67447	5.72694	4.84205	5.62368					3	5.21678	0.535523	10.2654
	73_YNYKSRF	3.07983	4.68925	3.07787	3.84291	3.3				3	3.59797	0.68532	19.0474
	84_YHTKSDH	21.5133	26.4402	26.3193	31.1488	18.6	21.6			3	24.2703	4.54103	18.7103
	86_YHTKYRH	2.8742	2.99931	2.30329	3.69563					3	2.96811	0.571855	19.2667
	89_YHTKYDF	16.0612	14.5032	14.2808	18.759					3	15.901	2.06342	12.9767
	90_YHTRSRH	3.86218	3.33633	3.72453	5.19057					3	4.0284	0.806137	20.0113
	93_YHTRSDF	15.8115	14.992	15.2302	17.9931					3	16.0067	1.36829	8.54825
	95_YHTRYRF	2.84372	2.53979	1.92569	4.13421	3.1	2.6	4.1	1.9	3	2.89293	0.859823	29.7216
	98_YHYKSRH	3.13226	3.08102	3.20478	4.54084	4.4				3	3.67178	0.732076	19.9379
	101_YHYKSDF	22.2884	17.4522	21.8837	31.6591	21	20.1	31.9		3	23.7548	5.70296	24.0077
	103_YHYKYRF	4.72744	4.70262	3.87219	5.89459					3	4.79921	0.831405	17.3238
	107_YHYRSRF	4.20082	5.27987	4.40151	4.96732					3	4.71238	0.498456	10.5776
	6_SNTKYDH	3.07189	2.05011	2.55549	2.42546					4	2.52574	0.422473	16.7267
	10_SNTRSDH	3.4661	2.71858	3.68957	2.43252					4	3.07669	0.597343	19.4151
	12_SNTRYRH	3.82714	2.76337	3.87266	3.98499					4	3.61204	0.569656	15.771
	15_SNTRYDF	0.7	0.733248	1.30176	1.13333	0.7	1.2	1.2	0.7	4	0.958543	0.271569	28.3314
	18_SNYKSDH	10.9383	13.2202	10.8059	15.3743					4	12.5847	2.16489	17.2026
	20_SNYKYRH	3.99129	3.5084	3.28833	3.96849					4	3.68913	0.347681	9.42448
	23_SNYKYDF	1.78833	1.99734	2.1553	1.0607	1.8	1.7	1.5		4	1.71452	0.356075	20.7681
	24_SNYRSRH	2.60297	2.26667	2.83625	3.38849					4	2.77359	0.471916	17.0146
	27_SNYRSDF	4.22673	3.19331	2.73112	3.18779					4	3.33474	0.632877	18.9783
	29_SNYRYRF	3.46515	2.634	2.5984	3.00903					4	2.92664	0.404213	13.8115
	40_SHTRYDH	11.8735	13.4236	11.8706	10.2459					4	11.8534	1.29745	10.9459
	47_SHYKYDH	13.6638	15.7389	13.3895	15.5402					4	14.5831	1.2277	8.41866
	51_SHYRSDH	21.1646	18.2427	24.2147	21.5345					4	21.2891	2.44372	11.4787
	53_SHYRYRH	5.00028	4.08776	3.44918	5.65627					4	4.54837	0.975026	21.4368
	56_SHYRYDF	9.08981	4.50966	7.88352	4.4	7.8	7.4	11.5		4	7.51186	2.49418	33.2033
	59_YNTKSDH	23.8637	20.4208	26.7806	29.8731					4	25.2345	4.03968	16.0085
	61_YNTKYRH	4.28836	3.3693	3.63647	5.25738	4.1				4	4.1303	0.727873	17.6227
	64_YNTKYDF	10.2503	10.7165	11.9727	10.5471					4	10.8716	0.758869	6.98026
	65_YNTRSRH	4.39719	3.86554	4.08682	5.2					4	4.38739	0.58398	13.3104
	68_YNTRSDF	9.65858	8.89908	11.7998	11.0449					4	10.3506	1.31251	12.6805
	70_YNTRYRF	3.58727	2.93411	2.33538	5.12244	4.4	4	4.7		4	3.86846	0.988786	25.5602
	72_YNYKSRH	3.06496	2.80923	2.06867	2.84188					4	2.69618	0.433502	16.0783
	75_YNYKSDF	27.9832	24.0766	27.1737	30.3121	31	26			4	27.7576	2.61034	9.40404
	77_YNYKYRF	4.88062	4.25359	3.50201	4.92145					4	4.38942	0.6659	15.1706
	80_YNYRSRF	4.21203	4.18997	3.02719	5.05438					4	4.12089	0.832798	20.2092
	88_YHTKYDH	16.3601	18.7	18.8483	20.971					4	18.7199	1.88442	10.0664
	92_YHTRSDH	19.7643	24.1111	19.1199	29.4844	20.1				4	22.5159	4.36022	19.365
	94_YHTRYRH	3.63448	3.10595	2.87406	4.93675	4.3	3.2	4.9	3	4	3.7439	0.85302	22.7842
	97_YHTRYDF	15.7712	14.4575	14.2362	14.6743					4	14.7848	0.681464	4.60923
	100_YHYKSDH	28.2926	34.0002	28.6407	33.3994	28.9	31.6			4	30.8055	2.53763	8.23759
	102_YHYKYRH	5.62921	4.53333	3.10299	4.47753	5.7				4	4.68861	1.05954	22.5981
	105_YHYKYDF	16.7297	20.873	19.302	20.5333					4	19.3595	1.87861	9.70383
	106_YHYRSRH	3.47154	2.82745	4.1957	3.86667					4	3.59034	0.588482	16.3907
	109_YHYRSDF	24.2	19.9209	20.0623	21.4					4	21.3958	1.98472	9.27622
	111_YHYRYRF	6.36393	4.40713	3.63093	5.23729	5.8	5.1			4	5.08988	0.974063	19.1372
	14_SNTRYDH	1.5282	1.7326	2.5562	1.64494	1.9	1.9			5	1.87699	0.362972	19.338
	22_SNYKYDH	6.69367	9.2	7.64158	5.1251	7.5	10.1	9.5		5	7.96576	1.75318	22.0089
	26_SNYRSDH	8.09107	9.45264	9.72838	9.63561					5	9.22692	0.765856	8.30023
	28_SNYRYRH	3.32603	2.75491	2.46483	3.63033					5	3.04402	0.529887	17.4074
	30_SNYRYDF	1.4	1.53594	1.67926	1.5					5	1.5288	0.115625	7.56315
	55_SHYRYDH	13.6093	15.7398	15.3352	15.5634					5	15.0619	0.982484	6.52297
	63_YNTKYDH	18.7333	21.9	20.4	20.3					5	20.3333	1.29357	6.36184
	67_YNTRSDH	28.0055	21.0235	22.8542	26.6907					5	24.6435	3.25576	13.2114
	69_YNTRYRH	3.84252	4.62693	3.74004	5.59376					5	4.45081	0.858789	19.2951
	71_YNTRYDF	12.3	12.3	11.9	10.9	12				5	11.88	0.576194	4.85012
	74_YNYKSDH	50.4159	31.6752	41.6646	43.2366	43.4				5	42.0784	6.72681	15.9864
	76_YNYKYRH	2.88599	3.91437	2.95394	4.4					5	3.53858	0.741831	20.9641
	78_YNYKYDF	27.3521	23.7795	22.3585	26.6224					5	25.0281	2.35435	9.40681
	79_YNYRSRH	2.56278	3.01761	2.16499	3.84437	3.1				5	2.93795	0.630956	21.4761
	81_YNYRSDF	27.5899	25.2607	22.0374	20.6284					5	23.8791	3.14313	13.1627
	82_YNYRYRF	3.27956	3.80768	3.37811	4.13182					5	3.64929	0.395037	10.825
	96_YHTRYDH	19.0667	18.2329	16.4766	24.8768					5	19.6632	3.63949	18.5091
	104_YHYKYDH	33.9793	33.4657	24.1716	36.8667					5	32.1208	5.50684	17.1442
	108_YHYRSDH	31.6178	27.104	29.1	30.7333					5	29.6388	1.98576	6.69987
	110_YHYRYRH	3.64133	4.14905	4.33531	4.45151					5	4.1443	0.357705	8.63125
	112_YHYRYDF	22.042	18.9053	17.8935	21.2667					5	20.0269	1.94993	9.73657
	120_SNYRYDH	4.59206	4.99177	3.92787	6.32334	5.9				6	5.14701	0.970713	18.8597
	121_YHYRYDH	32.3566	37.1536	25.5014	35.5741					6	32.6464	5.16464	15.8199
	122_YNTRYDH	18.2338	16.2425	15.3378	19.6					6	17.3535	1.92518	11.0939
	123_YNYKYDH	42.1012	33.4667	22.6662	34.5333	36.6	35.1	40.5	42.4	6	35.9209	6.39099	17.7918
	124_YNYRSDH	49.026	43.1	37.1	42.2667	38.7	38.3	40.3		6	41.2561	4.04665	9.80862
	125_YNYRYRH	2.9419	3.16155	3.3	3.1					6	3.12586	0.148447	4.74901
	126_YNYRYDF	23.4986	24.3683	19.4246	27.4667					6	23.6895	3.31431	13.9906
	128_YNYRYDH (20_39)	45.1	50.1737	34.8373	40.5	40.5	30.5	48.9	41	7	41.5583	7.42931	17.8769
		55.4	33.2	42.8123	35.7759
	127_SHTKSRF (WT NfsA)	4.72736	3.6	3.9	3.2	5	5.2	4.5	4.4	0	4.36263	0.674843	15.4687
		5.3	4.6	5	4.2	4.7	5	4.6	3.9
		3.1	3.6

## Sheet: Fig 2F
	36_37
	Mutation Added	Variant	Average EC50	StDev	Error Ratio	Fold Activity	Adjusted Error
	WT NfsA	127_SHTKSRF	4.8	0.7	0.145833	1	0.145833
	R225V+	3_SHTKSVF	13.2	2.3	0.174242	2.75	0.479167
	S41Y+	64_YHTKSVF	20.4	1.8	0.0882353	4.25	0.375
	T219Y+	80_YHYKSVF	30.3	4.1	0.135314	6.3125	0.854167
	F227G+	79_YHYKSVG	36.1	5.7	0.157895	7.52083	1.1875
	S224R+	83_YHYKRVG	39.5	6.2	0.156962	8.22917	1.29167
	H215C+	122_YCYKRVG	38.5	4.1	0.106494	8.02083	0.854167
	K222V+	128_YCYVRVG	43.9	1.8	0.0410023	9.14583	0.375
	20_39
	Mutation Added	Variant	Average EC50	StDev	Error Ratio	Fold Activity	Adjusted Error
	WT NfsA	127_SHTKSRF	4.4	0.7	0.159091	1	0.159091
	R225D+	118_SHTKSDF	11.5	1.8	0.156522	2.61364	0.409091
	S41Y+	85_YHTKSDF	18.1	3.8	0.209945	4.11364	0.863636
	F227H+	84_YHTKSDH	24.3	4.5	0.185185	5.52273	1.02273
	T219Y+	100_YHYKSDH	30.8	2.5	0.0811688	7	0.568182
	H215N+	74_YNYKSDH	42.1	6.7	0.159145	9.56818	1.52273
	K222R+	124_YNYRSDH	41.3	4	0.0968523	9.38636	0.909091
	S224Y+	128_YNYRYDH	41.6	7.4	0.177885	9.45455	1.68182
