# Supplementary material for: Intracellular complexities of acquiring a new enzymatic function revealed by mass-randomisation of active-site residues
Source: eLife. 2020 Nov 13;9:e59081. doi: 10.7554/eLife.59081 (PMC7738182; doi:10.7554/eLife.59081)
Supplement: Figure 3—source data 1. [file elife-59081-fig3-data1.xlsx]

## Sheet: Fig 3A
	Individual Substitutions in 36_37
	Substitution Added	Variant	EC50	StDev	Error Ratio	Fold Activity	Adjusted Error
	WT NfsA	127_SHTKSRF	4.8	0.7	0.145833	1	0.145833
	S41Y	118_YHTKSRF	5.1	1	0.196078	1.0625	0.208333
	H215C	32_SCTKSRF	3.7	0.3	0.0810811	0.770833	0.0625
	T219Y	119_SHYKSRF	4.3	0.7	0.162791	0.895833	0.145833
	K222V	9_SHTVSRF	4.6	0.8	0.173913	0.958333	0.166667
	S224R	5_SHTKRRF	2.2	0.2	0.0909091	0.458333	0.0416667
	R225V	3_SHTKSVF	13.2	2.3	0.174242	2.75	0.479167
	F227G	1_SHTKSRG	3.6	1	0.277778	0.75	0.208333
	Individual Substitutions in 20_39
	Substitution Added	Variant	EC50	StDev	Error Ratio	Fold Activity	Adjusted Error
	WT NfsA	127_SHTKSRF	4.4	0.7	0.159091	1	0.159091
	S41Y	113_YHTKSRF	4.8	0.9	0.1875	1.09091	0.204545
	H215N	114_SNTKSRF	4	0.6	0.15	0.909091	0.136364
	T219Y	115_SHYKSRF	4.3	0.4	0.0930233	0.977273	0.0909091
	K222R	116_SHTRSRF	4.3	0.7	0.162791	0.977273	0.159091
	S224Y	117_SHTKYRF	4.3	0.6	0.139535	0.977273	0.136364
	R225D	118_SHTKSDF	11.5	1.8	0.156522	2.61364	0.409091
	F227H	119_SHTKSRH	3.8	0.3	0.0789474	0.863636	0.0681818

## Sheet: Fig 3B
	Averaged EC50 Values							Fold Activity of WT NfsA (Observed)					Predicted Multiplicative Effect
	36_37 Substitutions	Variant	Averaged EC50	StDev	Error Ratio	n			Averaged EC50	StDev	n			EC50	StDev*	n
	WT NfsA	127_SHTKSRF	4.795	0.717066	0.149545	20		NfsA_Ec	1	0.157269	38		S41Y + R225V/D	2.90177	0.696563	21
	S41Y	118_YHTKSRF	5.075	0.991211	0.195313	4		S41Y	1.07856	0.196274	8		S41Y + T219Y + R225V/D	2.67923	0.739593	29
	T219Y	119_SHYKSRF	4.25	0.685565	0.16131	4		T219Y	0.923308	0.11526	8		T219Y + R225V/D	2.48409	0.45	21
	R225V	3_SHTKSVF	13.1667	2.26598	0.1721	6		R225V/D	2.69042	0.45997	13		S41Y + T219Y	0.995839	0.21095	16
	S41Y + R225V	64_YHTKSVF	20.4333	1.81622	0.0888853	6		S41Y + R225V/D	4.20268	0.69543	13
	S41Y + T219Y	78_YHYKSRF	5.375	0.834166	0.155194	4		S41Y + T219Y	1.0949	0.18332	8
	T219Y + R225V	18_SHYKSVF	12.675	2.31715	0.182812	4		T219Y + R225V/D	2.74269	0.507326	8		*Error calculated using error propagation equation
	S41Y + T219Y + R225V	80_YHYKSVF	30.2833	4.05878	0.134027	6		S41Y + T219Y + R225V/D	5.88899	1.28053	13
	20_39 Substitutions	Variant	Averaged EC50	StDev	Error Ratio	n
	WT NfsA	127_SHTKSRF	4.36111	0.674004	0.154549	18
	S41Y	113_YHTKSRF	4.825	0.932291	0.193221	4
	T219Y	115_SHYKSRF	4.225	0.4272	0.101112	4
	R225D	118_SHTKSDF	11.5286	1.78579	0.154901	7
	S41Y + R225D	85_YHTKSDF	18.1429	3.84701	0.21204	7
	S41Y + T219Y	99_YHYKSRF	4.675	0.7932	0.169669	4
	T219Y + R225D	44_SHYKSDF	12.5	2.69444	0.215555	4
	S41Y + T219Y + R225D	101_YHYKSDF	23.7714	5.70226	0.239879	7
	Averaged Data	Averaged EC50	StDev	Error Ratio	n
	WT NfsA	4.58947	0.721781	0.157269	38
	S41Y	4.95	0.900793	0.181978	8
	T219Y	4.2375	0.528982	0.124833	8
	R225V/D	12.3476	2.11102	0.170966	13
	S41Y + R225V/D	19.2881	3.19166	0.165473	13
	S41Y + T219Y	5.025	0.841342	0.167431	8
	T219Y + R225V/D	12.5875	2.32836	0.184974	8
	S41Y + T219Y + R225V/D	27.0274	5.87695	0.217444	13
	36_37 Raw Data
	WT NfsA	S41Y	T219Y	R225V	S41Y + R225V	S41Y + T219Y	T219Y + R225V	S41Y + T219Y + R225V
	4.5	5.3	4.7	15.5	22.8	4.8	12.3	31.1
	5	6.2	4.2	14.2	18.7	6.6	15.8	29.2
	5.3	5	3.3	9.9	22.2	4.9	10.2	35.2
	5.4	3.8	4.8	15.3	20.6	5.2	12.4	34.4
	5			11.2	20			25.2
	4.9			12.9	18.3			26.6
	5.6
	4.7
	4.5
	4.8
	4.6
	3.8
	4.7
	4.4
	4.9
	5.6
	5.4
	6.1
	3.1
	3.6
	20_39 Raw Data
	WT NfsA	S41Y	T219Y	R225D	S41Y + R225D	S41Y + T219Y	T219Y + R225D	S41Y + T219Y + R225D
	4.7	3.6	3.7	9.8	15.6	4.1	11.3	22.3
	3.6	5.6	4.7	13.9	17.5	4.9	13	17.5
	3.9	4.6	4.1	8.7	20.5	4	9.7	21.9
	3.2	5.5	4.4	11.9	21.2	5.7	16	31.7
	5			12.9	24			31.9
	5.2			11.3	14			20.1
	4.5			12.2	14.2			21
	4.4
	5.3
	4.6
	5
	4.2
	4.7
	5
	4.6
	3.9
	3.1
	3.6

## Sheet: Fig 3C
	Averaged EC50 Values						Fold Activity of WT NfsA_Ec
	20_39 Substitutions	Averaged EC50	StDev	Error Ratio	n			Averaged EC50	StDev	n
	WT NfsA_Ec	4.5887	0.717847	0.156438	38		WT NfsA_Ec	1	0.156438	36
	R225D	11.5	1.8	0.156522	7		R225D	2.50616	0.392268	7
	S41Y R225D	18.1	3.8	0.209945	7		S41Y R225D	3.94447	0.828121	7
	S41Y T219Y R225D	23.8	5.7	0.239496	7		S41Y T219Y R225D	5.18665	1.24218	7
	S41Y T219Y R225D F227H	30.8	2.5	0.0811688	6		S41Y T219Y R225D F227H	6.71214	0.544817	6
	R225D H215N	1.4	0.3	0.214286	4		R225D H215N	0.305097	0.065378	4
	S41Y H215N R225D	11.3	1.8	0.159292	4		S41Y H215N R225D	2.46257	0.392268	4
	S41Y H215N T219Y R225D	27.8	2.6	0.0935252	6		S41Y H215N T219Y R225D	6.05836	0.566609	6
	S41Y H215N T219Y R225D F227H	42.1	6.7	0.159145	5		S41Y H215N T219Y R225D F227H	9.17471	1.46011	5
