# Supplementary material for: Intracellular complexities of acquiring a new enzymatic function revealed by mass-randomisation of active-site residues
Source: eLife. 2020 Nov 13;9:e59081. doi: 10.7554/eLife.59081 (PMC7738182; doi:10.7554/eLife.59081)
Supplement: Figure 4—source data 1. [file elife-59081-fig4-data1.xlsx]

## Sheet: Fig 4A
								Rate Adjusted for Background			Rate Adjusted [Enzyme] Pathlength
		[Reaction]	Repeat 1	Repeat 2	Repeat 3	Rate No Enzyme	Rate No Quinone	1	2	3	1	2	3	Average Rate	StDev	Fold Activity
	WT NfsA	0.08	0.002414	0.002645	0.002496	0.00039	0.000112	0.0239	0.0267875	0.024925	8.53023	9.56081	8.89606	8.9957	0.522468	1
	36_37_3 (+R225V)	0.8	0.003477	0.003373	0.002937	0.00039	0.000573	0.0031425	0.0030125	0.0024675	1.1216	1.0752	0.880683	1.02583	0.127822	0.114035
	36_37_64 (+S41Y)	0.8	0.00085	0.000921	0.000996	0.00039	0.000316	0.00018	0.00026875	0.0003625	0.0642444	0.0959204	0.129381	0.0965153	0.0325724	N.D less than 0.1
	36_37_80 (+T219Y)	0.8	0.000798	0.000879	0.000766	0.00039	0.000408	0	0.00010125	-4e-05	0	0.0361375	-0.0142765	0.00728698	0.0259849
	36_37_79 (+F227G)	0.8	0.001116	0.001074	0.000999	0.00039	0.000691	4.375e-05	-8.75e-06	-0.0001025	0.015615	-0.00312299	-0.0365836	-0.00803055	0.0264431
	36_37_83 (+S224R)	0.8	0.001256	0.001332	0.001377	0.00039	0.000652	0.0002675	0.0003625	0.00041875	0.0954743	0.129381	0.149457	0.124771	0.0272852
	36_37_122 (+H215C)	0.8	0.000517	0.000528	0.000555	0.00039	0.000389	-0.0003275	-0.00031375	-0.00028	-0.116889	-0.111982	-0.0999357	-0.109602	0.00872356
	36_37 (+K222V)	0.8	0.000963	0.000889	0.000878	0.00039	0.000672	-0.00012375	-0.00021625	-0.00023	-0.044168	-0.0771825	-0.08209	-0.0678135	0.0206241

## Sheet: Fig 4B
								Rate Adjusted for Background			Rate Adjusted [Enzyme] Pathlength
		[Reaction]	Repeat 1	Repeat 2	Repeat 3	Rate No Enzyme	Rate No Quinone	1	2	3	1	2	3	Average Rate	StDev	Fold Activity
	WT NfsA	0.08	0.002414	0.002645	0.002496	0.00039	0.000112	0.0239	0.0267875	0.024925	8.53023	9.56081	8.89606	8.9957	0.522468	1
	20_39_118 (+R225D)	0.8	0.001696	0.001987	0.001843	0.00039	0.000883	0.00052875	0.0008925	0.0007125	0.188718	0.318545	0.254301	0.253855	0.0649147	0.0282195
	20_39_85 (+S41Y)	0.8	0.000841	0.000761	0.000703	0.00039	0.000503	-6.5e-05	-0.000165	-0.0002375	-0.0231994	-0.0588907	-0.0847669	-0.055619	0.0309139	N.D less than 0.1
	20_39_84 (+F227H)	0.8	0.000761	0.000845	0.00086	0.00039	0.000475	-0.00013	-2.5e-05	-6.25e-06	-0.0463987	-0.00892283	-0.00223071	-0.0191841	0.0238049
	20_39_100 (+T219Y)	0.8	0.001409	0.001322	0.00124	0.00039	0.00084	0.00022375	0.000115	1.25e-05	0.0798593	0.041045	0.00446141	0.0417886	0.0377045
	20_39_74 (+H215N)	0.8	0.001036	0.001045	0.00109	0.00039	0.000713	-8.375e-05	-7.25e-05	-1.625e-05	-0.0298915	-0.0258762	-0.00579984	-0.0205225	0.0129073
	20_39_124 (+K222R)	0.8	0.000985	0.000947	0.000982	0.00039	0.000562	4.125e-05	-6.25e-06	3.75e-05	0.0147227	-0.00223071	0.0133842	0.0086254	0.00942545
	20_39 (+S224Y)	0.8	0.000766	0.000739	0.000684	0.00039	0.00044	-8e-05	-0.00011375	-0.0001825	-0.0285531	-0.0405989	-0.0651367	-0.0447629	0.0186439

## Sheet: Fig 4C & E
	WT NfsA					36_37_3 (+R225V)					36_37_64 (+S41Y)					36_37_80 (+T219Y)					36_37_79 (+F227G)					36_37_83 (+S224R)					36_37_122 (+H215C)					36_37 (+K222V)
	Raw Data					Raw Data					Raw Data					Raw Data					Raw Data					Raw Data					Raw Data					Raw Data
	0	0.00117	0.001378	0.001237		0	0.000546	0.000561	0.000412		0	0.000225	0.000222	0.00023		0	0.000464	0.000505	0.000501		0	0.000213	0.000269	0.000207		0	0.000384	0.000376	0.000409		0	0.000375	0.000376	0.000328		0	0.0003	0.000289	0.000275
	100	0.001567	0.001541	0.001511		100	0.001022	0.00092	0.00108		50	0.000385	0.000357	0.000409		25	0.000546	0.00059	0.000588		50	0.000419	0.000392	0.0004		50	0.000825	0.000835	0.000815		25	0.000551	0.000518	0.00055		50	0.00046	0.000457	0.0004
	400	0.002317	0.002473	0.002164		400	0.001765	0.001877	0.001985		200	0.000646	0.000664	0.000622		50	0.000641	0.000725	0.000708		100	0.000564	0.000526	0.000525		100	0.000925	0.001013	0.001036		50	0.000627	0.000661	0.000591		100	0.00055	0.000563	0.00055
	800	0.003087	0.002934	0.003007		600	0.002219	0.002464	0.002355		400	0.00072	0.000688	0.000706		100	0.001096	0.001086	0.001078		200	0.000782	0.000713	0.000709		200	0.001209	0.001104	0.001143		100	0.000755	0.000751	0.000763		200	0.000722	0.000693	0.000739
	1500	0.003445	0.003835	0.003641		800	0.003081	0.002945	0.003088		600	0.000786	0.000789	0.000769		200	0.00104	0.001233	0.001115		400	0.000741	0.000835	0.00087		400	0.001332	0.001334	0.001394		200	0.000843	0.000866	0.000875		400	0.000677	0.000673	0.000772
	2000	0.004049	0.00394	0.004106		1000	0.003134	0.003186	0.003274		1000	0.00085	0.000811	0.000854		400	0.001387	0.001244	0.001225		600	0.0009	0.00089	0.000985		600	0.00154	0.00158	0.001541		400	0.000982	0.000968	0.000933		600	0.000821	0.00082	0.00081
	3000	0.004055	0.004365	0.004037		2000	0.003903	0.003919	0.003757		1500	0.000817	0.000804	0.000804		600	0.001259	0.001292	0.001322		1000	0.001003	0.000984	0.0011		1000	0.001629	0.001688	0.00167		600	0.001147	0.001032	0.001043		1000	0.000856	0.00087	0.000876
	4000	0.004313	0.004533	0.004392		3000	0.003739	0.003897	0.003679							1000	0.001734	0.001691	0.001687		2000	0.001018	0.001101	0.001103		2000	0.001816	0.001744	0.001855		1000	0.001024	0.001012	0.001044		2000	0.000839	0.000835	0.000852
	Adjusted for Pathlength and Extinction Coefficient					Adjusted for Pathlength and Extinction Coefficient					Adjusted for Pathlength and Extinction Coefficient					Adjusted for Pathlength and Extinction Coefficient					Adjusted for Pathlength and Extinction Coefficient					Adjusted for Pathlength and Extinction Coefficient					Adjusted for Pathlength and Extinction Coefficient					Adjusted for Pathlength and Extinction Coefficient
	0	0.208794	0.245913	0.220751		0	0.0974373	0.100114	0.0735241		0	0.0401527	0.0396174	0.041045		0	0.0828039	0.0901206	0.0894068		0	0.0380113	0.0480048	0.0369405		0	0.0685273	0.0670997	0.0729887		0	0.0669212	0.0670997	0.0585338		0	0.053537	0.051574	0.0490756
	100	0.279641	0.275002	0.269648		100	0.182383	0.16418	0.192733		50	0.0687058	0.063709	0.0729887		25	0.0974373	0.105289	0.104932		50	0.0747733	0.069955	0.0713826		50	0.147227	0.149011	0.145442		25	0.0983296	0.0924405	0.0981511		50	0.08209	0.0815547	0.0713826
	400	0.413484	0.441323	0.38618		400	0.314976	0.334963	0.354236		200	0.115283	0.118495	0.111		50	0.114391	0.129381	0.126347		100	0.10065	0.0938682	0.0936897		100	0.165072	0.180777	0.184881		50	0.111892	0.11796	0.105468		100	0.0981511	0.100471	0.0981511
	800	0.550895	0.523592	0.536619		600	0.395995	0.439717	0.420265		400	0.128489	0.122778	0.12599		100	0.195588	0.193804	0.192376		200	0.139553	0.12724	0.126526		200	0.215754	0.197016	0.203976		100	0.134735	0.134021	0.136162		200	0.128846	0.12367	0.131879
	1500	0.614783	0.684381	0.64976		800	0.549825	0.525555	0.551074		600	0.140267	0.140802	0.137233		200	0.185595	0.220037	0.198979		400	0.132236	0.149011	0.155257		400	0.237704	0.238061	0.248768		200	0.150439	0.154543	0.15615		400	0.120815	0.120101	0.137768
	2000	0.722571	0.703119	0.732743		1000	0.559283	0.568563	0.584267		1000	0.151688	0.144728	0.152402		400	0.247519	0.222	0.218609		600	0.160611	0.158826	0.17578		600	0.274823	0.281961	0.275002		400	0.175244	0.172746	0.1665		600	0.146513	0.146334	0.14455
	3000	0.723641	0.778963	0.720429		2000	0.696516	0.699371	0.670461		1500	0.145799	0.143479	0.143479		600	0.224677	0.230566	0.23592		1000	0.178992	0.175601	0.196302		1000	0.290706	0.301235	0.298023		600	0.20469	0.184167	0.18613		1000	0.152759	0.155257	0.156328
	4000	0.769683	0.808944	0.783781		3000	0.667249	0.695445	0.656542							1000	0.309444	0.30177	0.301056		2000	0.181669	0.196481	0.196838		2000	0.324077	0.311228	0.331037		1000	0.18274	0.180598	0.186309		2000	0.149725	0.149011	0.152045
	Normalised for 0 uM					Normalised for 0 uM					Normalised for 0 uM					Normalised for 0 uM					Normalised for 0 uM					Normalised for 0 uM					Normalised for 0 uM					Normalised for 0 uM
	0	-0.0163585	0.0207605	-0.00440193		0	0.00707878	0.00975563	-0.0168344		0	-0.000118971	-0.000654341	0.000773312		0	-0.00463987	0.00267685	0.00196302		0	-0.00297428	0.00701929	-0.00404502		0	-0.00101125	-0.00243891	0.00345016		0	0.00273633	0.00291479	-0.00565113		0	0.00214148	0.000178457	-0.00231994
	100	0.0544887	0.0498489	0.0444952		100	0.0920241	0.0738215	0.102375		50	0.0284341	0.0234373	0.032717		25	0.00999357	0.0178457	0.0174887		50	0.0337878	0.0289695	0.0303971		50	0.0776881	0.0794727	0.0759035		25	0.0341447	0.0282556	0.0339662		50	0.0306945	0.0301592	0.0199871
	400	0.188331	0.21617	0.161027		400	0.224617	0.244605	0.263878		200	0.0750113	0.0782235	0.0707283		50	0.0269469	0.0419373	0.0389035		100	0.059664	0.0528826	0.0527042		100	0.0955338	0.111238	0.115342		50	0.0477074	0.0537749	0.041283		100	0.0467556	0.0490756	0.0467556
	800	0.325743	0.298439	0.311466		600	0.305637	0.349359	0.329907		400	0.088217	0.0825064	0.0857186		100	0.108145	0.10636	0.104932		200	0.0985675	0.086254	0.0855402		200	0.146215	0.127477	0.134437		100	0.0705498	0.069836	0.0719775		200	0.0774502	0.0722749	0.0804839
	1500	0.38963	0.459228	0.424608		800	0.459466	0.435196	0.460715		600	0.0999952	0.100531	0.0969614		200	0.0981511	0.132593	0.111535		400	0.0912508	0.108026	0.114272		400	0.168166	0.168523	0.17923		200	0.086254	0.0903585	0.0919646		400	0.0694196	0.0687058	0.086373
	2000	0.497418	0.477966	0.50759		1000	0.468924	0.478204	0.493908		1000	0.111416	0.104457	0.11213		400	0.160076	0.134556	0.131166		600	0.119625	0.117841	0.134794		600	0.205285	0.212423	0.205463		400	0.111059	0.108561	0.102315		600	0.0951174	0.0949389	0.0931543
	3000	0.498489	0.55381	0.495277		2000	0.606158	0.609013	0.580103		1500	0.105527	0.103207	0.103207		600	0.137233	0.143122	0.148476		1000	0.138006	0.134616	0.155317		1000	0.221167	0.231696	0.228484		600	0.140505	0.119982	0.121945		1000	0.101363	0.103862	0.104932
	4000	0.544531	0.583791	0.558629		3000	0.576891	0.605087	0.566183							1000	0.222	0.214326	0.213613		2000	0.140683	0.155495	0.155852		2000	0.254539	0.24169	0.261498		1000	0.118555	0.116413	0.122124		2000	0.0983296	0.0976158	0.10065
	Normalised for [Enzmye]					Normalised for [Enzmye]					Normalised for [Enzmye]					Normalised for [Enzmye]					Normalised for [Enzmye]					Normalised for [Enzmye]					Normalised for [Enzmye]					Normalised for [Enzmye]
	Prism Input					Prism Input					Prism Input					Prism Input					Prism Input					Prism Input					Prism Input					Prism Input
	0	-0.0204482	0.0259506	-0.00550241		0	0.00884847	0.0121945	-0.021043		0	-0.000148714	-0.000817926	0.00096664		0	-0.00579984	0.00334606	0.00245378		0	-0.00371785	0.00877412	-0.00505627		0	-0.00126407	-0.00304863	0.0043127		0	0.00342042	0.00364349	-0.00706391		0	0.00267685	0.000223071	-0.00289992
	100	0.0681109	0.0623111	0.055619		100	0.11503	0.0922769	0.127968		50	0.0355426	0.0292966	0.0408963		25	0.012492	0.0223071	0.0218609		50	0.0422347	0.0362118	0.0379964		50	0.0971101	0.0993408	0.0948794		25	0.0426809	0.0353195	0.0424578		50	0.0383682	0.037699	0.0249839
	400	0.235414	0.270213	0.201284		400	0.280772	0.305756	0.329847		200	0.0937641	0.0977793	0.0884104		50	0.0336837	0.0524216	0.0486294		100	0.07458	0.0661033	0.0658802		100	0.119417	0.139047	0.144178		50	0.0596342	0.0672186	0.0516037		100	0.0584445	0.0613445	0.0584445
	800	0.407178	0.373049	0.389333		600	0.382046	0.436698	0.412383		400	0.110271	0.103133	0.107148		100	0.135181	0.13295	0.131166		200	0.123209	0.107818	0.106925		200	0.182769	0.159347	0.168047		100	0.0881873	0.087295	0.0899719		200	0.0968127	0.0903436	0.100605
	1500	0.487038	0.574035	0.53076		800	0.574333	0.543995	0.575894		600	0.124994	0.125663	0.121202		200	0.122689	0.165742	0.139419		400	0.114064	0.135032	0.14284		400	0.210207	0.210653	0.224037		200	0.107818	0.112948	0.114956		400	0.0867745	0.0858822	0.107966
	2000	0.621773	0.597458	0.634488		1000	0.586156	0.597755	0.617385		1000	0.13927	0.130571	0.140163		400	0.200094	0.168195	0.163957		600	0.149532	0.147301	0.168493		600	0.256606	0.265529	0.256829		400	0.138824	0.135701	0.127894		600	0.118897	0.118674	0.116443
	3000	0.623111	0.692263	0.619096		2000	0.757697	0.761266	0.725129		1500	0.131909	0.129009	0.129009		600	0.171541	0.178903	0.185595		1000	0.172508	0.16827	0.194146		1000	0.276459	0.28962	0.285605		600	0.175631	0.149978	0.152432		1000	0.126704	0.129827	0.131166
	4000	0.680663	0.729739	0.698286		3000	0.721113	0.756359	0.707729							1000	0.2775	0.267908	0.267016		2000	0.175854	0.194369	0.194815		2000	0.318173	0.302112	0.326873		1000	0.148193	0.145516	0.152655		2000	0.122912	0.12202	0.125812
	Catalytic Parameters					Catalytic Parameters					Catalytic Parameters					Catalytic Parameters					Catalytic Parameters					Catalytic Parameters					Catalytic Parameters					Catalytic Parameters
	[WT NfsA]	0.8				[+R225V]	0.8				[+S41Y]	0.8				[+T219Y]	0.8				[+F227G]	0.8				[+S224R]	0.8				[+H215C]	0.8				[+K222V]	0.8
	Catalytic Parameters from Prism					Catalytic Parameters from Prism					Catalytic Parameters from Prism					Catalytic Parameters from Prism					Catalytic Parameters from Prism					Catalytic Parameters from Prism					Catalytic Parameters from Prism					Catalytic Parameters from Prism
		Value	Error	Unit			Value	Error	Unit			Value	Error	Unit			Value	Error	Unit			Value	Error	Unit			Value	Error	Unit			Value	Error	Unit			Value	Error	Unit
	vmax	0.8933	0.0297			vmax	0.9574	0.04119			vmax	0.1487	0.003347			vmax	0.2863	0.02253			vmax	0.2083	0.006108			vmax	0.3294	0.007947			vmax	0.1754	0.007165			vmax	0.1376	0.004345
	kcat	0.8933	0.0297	s-1		kcat	0.9574	0.04119	s-1		kcat	0.1487	0.003347	s-1		kcat	0.2863	0.02253	s-1		kcat	0.2083	0.006108	s-1		kcat	0.3294	0.007947	s-1		kcat	0.1754	0.007165	s-1		kcat	0.1376	0.004345	s-1
	Km	1042	97.92	uM		Km	690.6	79.76	uM		Km	136.2	13.34	uM		Km	200.8	45.79	uM		Km	199.6	20.13	uM		Km	163.2	14.45	uM		Km	111.9	15.94	uM		Km	125.1	15.81	uM
	kcat/KM	0.000857294	8.53341e-05	uM-1.s-1		kcat/KM	0.00138633	0.000171439	uM-1.s-1		kcat/KM	0.00109178	0.000107711	uM-1.s-1		kcat/KM	0.0014258	0.000349455	uM-1.s-1		kcat/KM	0.00104359	0.000109202	uM-1.s-1		kcat/KM	0.00201838	0.000180681	uM-1.s-1		kcat/KM	0.00156747	0.000237947	uM-1.s-1		kcat/KM	0.00109992	0.000146888	uM-1.s-1
		857.294	85.3341	M-1.s-1			1386.33	171.439	M-1.s-1			1091.78	107.711	M-1.s-1			1425.8	349.455	M-1.s-1			1043.59	109.202	M-1.s-1			2018.38	180.681	M-1.s-1			1567.47	237.947	M-1.s-1			1099.92	146.888	M-1.s-1
	*kcat/KM error calculated using					*kcat/KM error calculated using					*kcat/KM error calculated using					*kcat/KM error calculated using					*kcat/KM error calculated using					*kcat/KM error calculated using					*kcat/KM error calculated using					*kcat/KM error calculated using
	error propagation equation					error propagation equation					error propagation equation					error propagation equation					error propagation equation					error propagation equation					error propagation equation					error propagation equation

## Sheet: Fig 4D & F
	WT NfsA					20_39_118 (+R225D)					20_39_85 (+S41Y)					20_39_84 (+F227H)					20_39_100 (+T219Y)					20_39_74 (+H215N)					20_39_124 (+K222R)					20_39 (+S224Y)
	Raw Data					Raw Data					Raw Data					Raw Data					Raw Data					Raw Data					Raw Data					Raw Data
	0	0.00117	0.001378	0.001237		0	0.000899	0.000988	0.000738		0	0.000458	0.000362	0.000452		0	0.000378	0.000361	0.000384		0	0.000335	0.000317	0.000328		0	0.000431	0.000395	0.000413		0	0.000698	0.000728	0.000675		0	0.000357	0.00034	0.00033
	100	0.001567	0.001541	0.001511		100	0.001178	0.001596	0.001491		50	0.000517	0.000489	0.00052		50	0.000468	0.00048	0.000449		50	0.000621	0.000581	0.000539		50	0.000802	0.000722	0.000785		25	0.000812	0.000855	0.000803		50	0.000593	0.000582	0.000564
	400	0.002317	0.002473	0.002164		400	0.001956	0.002264	0.002325		200	0.000719	0.00075	0.000689		100	0.000528	0.000501	0.000526		100	0.000792	0.000721	0.000805		100	0.000817	0.000854	0.000908		50	0.000959	0.001066	0.000961		100	0.000785	0.000801	0.000794
	800	0.003087	0.002934	0.003007		600	0.002946	0.003087	0.0027		400	0.000828	0.00084	0.000862		200	0.000605	0.0006	0.000567		200	0.000924	0.000915	0.000895		200	0.001094	0.000988	0.001062		100	0.001069	0.001099	0.001049		200	0.000856	0.000872	0.000791
	1500	0.003445	0.003835	0.003641		800	0.00275	0.00275	0.003097		600	0.000928	0.000907	0.000876		400	0.000717	0.000767	0.000674		400	0.00117	0.001294	0.001154		400	0.000988	0.001151	0.001119		200	0.001126	0.001116	0.001083		400	0.000881	0.00085	0.000855
	2000	0.004049	0.00394	0.004106		1000	0.003307	0.002723	0.003129		1000	0.000961	0.00094	0.000926		600	0.000779	0.000745	0.000766		600	0.001408	0.001279	0.001348		600	0.001232	0.001185	0.001222		400	0.00128	0.001344	0.001362		600	0.000989	0.000948	0.000922
	3000	0.004055	0.004365	0.004037		2000	0.003402	0.003615	0.003394		1500	0.000892	0.000908	0.00098		1000	0.000843	0.000807	0.000822		1000	0.001403	0.001402	0.00145		1000	0.001084	0.001155	0.00119		600	0.001256	0.001288	0.001381		1000	0.000941	0.001041	0.001003
	4000	0.004313	0.004533	0.004392		3000	0.00384	0.003421	0.00347		3000	0.000867	0.000807	0.000858		2000	0.00088	0.000892	0.000909		2000	0.001387	0.001376	0.001309		2000	0.001309	0.00137	0.001314		1000	0.001406	0.001429	0.00142		2000	0.001069	0.001068	0.001031
	Adjusted for Pathlength and Extinction Coefficient					Adjusted for Pathlength and Extinction Coefficient					Adjusted for Pathlength and Extinction Coefficient					Adjusted for Pathlength and Extinction Coefficient					Adjusted for Pathlength and Extinction Coefficient					Adjusted for Pathlength and Extinction Coefficient					Adjusted for Pathlength and Extinction Coefficient					Adjusted for Pathlength and Extinction Coefficient
	0	0.208794	0.245913	0.220751		0	0.160432	0.176315	0.131701		0	0.0817331	0.0646013	0.0806624		0	0.0674566	0.0644228	0.0685273		0	0.059783	0.0565707	0.0585338		0	0.0769148	0.0704904	0.0737026		0	0.124563	0.129916	0.120458		0	0.063709	0.0606752	0.0588907
	100	0.279641	0.275002	0.269648		100	0.210222	0.284817	0.266079		50	0.0922621	0.0872653	0.0927974		50	0.0835177	0.0856592	0.080127		50	0.110822	0.103683	0.0961881		50	0.143122	0.128846	0.140088		25	0.144907	0.15258	0.143301		50	0.105825	0.103862	0.10065
	400	0.413484	0.441323	0.38618		400	0.349061	0.404026	0.414912		200	0.12831	0.133842	0.122957		100	0.0942251	0.0894068	0.0938682		100	0.141338	0.128667	0.143658		100	0.145799	0.152402	0.162039		50	0.17114	0.190235	0.171497		100	0.140088	0.142944	0.141695
	800	0.550895	0.523592	0.536619		600	0.525733	0.550895	0.481833		400	0.147762	0.149904	0.15383		200	0.107966	0.107074	0.101185		200	0.164894	0.163288	0.159719		200	0.195232	0.176315	0.189521		100	0.19077	0.196124	0.187201		200	0.152759	0.155614	0.141159
	1500	0.614783	0.684381	0.64976		800	0.490756	0.490756	0.55268		600	0.165608	0.16186	0.156328		400	0.127953	0.136876	0.12028		400	0.208794	0.230923	0.205939		400	0.176315	0.205404	0.199693		200	0.200942	0.199158	0.193268		400	0.15722	0.151688	0.15258
	2000	0.722571	0.703119	0.732743		1000	0.590156	0.485937	0.558391		1000	0.171497	0.167749	0.165251		600	0.139018	0.13295	0.136698		600	0.251267	0.228246	0.240559		600	0.219859	0.211471	0.218074		400	0.228424	0.239846	0.243058		600	0.176494	0.169177	0.164537
	3000	0.723641	0.778963	0.720429		2000	0.607109	0.645121	0.605682		1500	0.159183	0.162039	0.174887		1000	0.150439	0.144014	0.146691		1000	0.250375	0.250196	0.258762		1000	0.193447	0.206117	0.212363		600	0.224141	0.229852	0.246449		1000	0.167928	0.185773	0.178992
	4000	0.769683	0.808944	0.783781		3000	0.685273	0.6105	0.619244		3000	0.154722	0.144014	0.153116		2000	0.157042	0.159183	0.162217		2000	0.247519	0.245556	0.2336		2000	0.2336	0.244486	0.234492		1000	0.25091	0.255014	0.253408		2000	0.19077	0.190592	0.183989
	Normalised for 0 uM					Normalised for 0 uM					Normalised for 0 uM					Normalised for 0 uM					Normalised for 0 uM					Normalised for 0 uM					Normalised for 0 uM					Normalised for 0 uM
	0	-0.0163585	0.0207605	-0.00440193		0	0.00428296	0.0201656	-0.0244486		0	0.00606752	-0.0110643	0.00499678		0	0.000654341	-0.00237942	0.00172508		0	0.00148714	-0.00172508	0.000237942		0	0.00321222	-0.00321222	0		0	-0.000416399	0.0049373	-0.0045209		0	0.00261736	-0.000416399	-0.00220096
	100	0.0544887	0.0498489	0.0444952		100	0.0540723	0.128667	0.109929		50	0.0165965	0.0115997	0.0171318		50	0.0167154	0.0188569	0.0133248		50	0.0525257	0.0453875	0.0378923		50	0.0694196	0.0551431	0.0663859		25	0.0199277	0.0276013	0.0183215		50	0.0447331	0.0427701	0.0395579
	400	0.188331	0.21617	0.161027		400	0.192912	0.247876	0.258762		200	0.0526447	0.0581768	0.047291		100	0.0274228	0.0226045	0.0270659		100	0.0830418	0.0703714	0.0853617		100	0.0720965	0.0786994	0.088336		50	0.0461608	0.0652556	0.0465177		100	0.0789968	0.0818521	0.0806029
	800	0.325743	0.298439	0.311466		600	0.369584	0.394746	0.325683		400	0.0720965	0.0742379	0.078164		200	0.041164	0.0402717	0.0343826		200	0.106598	0.104992	0.101423		200	0.121529	0.102613	0.115818		100	0.065791	0.0711447	0.0622219		200	0.0916672	0.0945225	0.0800675
	1500	0.38963	0.459228	0.424608		800	0.334606	0.334606	0.396531		600	0.0899421	0.0861945	0.0806624		400	0.0611511	0.070074	0.0534775		400	0.150498	0.172627	0.147643		400	0.102613	0.131701	0.12599		200	0.075963	0.0741785	0.0682894		400	0.0961286	0.0905965	0.0914887
	2000	0.497418	0.477966	0.50759		1000	0.434006	0.329788	0.402241		1000	0.0958312	0.0920836	0.0895852		600	0.0722154	0.0661479	0.0698955		600	0.192971	0.16995	0.182264		600	0.146156	0.137768	0.144371		400	0.103445	0.114867	0.118079		600	0.115402	0.108085	0.103445
	3000	0.498489	0.55381	0.495277		2000	0.45096	0.488971	0.449532		1500	0.0835177	0.086373	0.0992219		1000	0.0836367	0.0772122	0.0798891		1000	0.192079	0.1919	0.200466		1000	0.119744	0.132415	0.138661		600	0.0991624	0.104873	0.121469		1000	0.106836	0.124682	0.1179
	4000	0.544531	0.583791	0.558629		3000	0.529124	0.45435	0.463095		3000	0.0790563	0.0683489	0.0774502		2000	0.0902395	0.092381	0.0954148		2000	0.189223	0.18726	0.175304		2000	0.159897	0.170783	0.160789		1000	0.125931	0.130035	0.128429		2000	0.129678	0.1295	0.122897
	Normalised for [Enzmye]					Normalised for [Enzmye]					Normalised for [Enzmye]					Normalised for [Enzmye]					Normalised for [Enzmye]					Normalised for [Enzmye]					Normalised for [Enzmye]					Normalised for [Enzmye]
	Prism Input					Prism Input					Prism Input					Prism Input					Prism Input					Prism Input					Prism Input					Prism Input
	0	-0.0204482	0.0259506	-0.00550241		0	0.0053537	0.025207	-0.0305607		0	0.00758441	-0.0138304	0.00624598		0	0.000817926	-0.00297428	0.00215635		0	0.00185892	-0.00215635	0.000297428		0	0.00401527	-0.00401527	0		0	-0.000520498	0.00617162	-0.00565113		0	0.0032717	-0.000520498	-0.00275121
	100	0.0681109	0.0623111	0.055619		100	0.0675904	0.160834	0.137412		50	0.0207456	0.0144996	0.0214148		50	0.0208943	0.0235711	0.0166559		50	0.0656572	0.0567343	0.0473654		50	0.0867745	0.0689289	0.0829823		25	0.0249096	0.0345016	0.0229019		50	0.0559164	0.0534626	0.0494473
	400	0.235414	0.270213	0.201284		400	0.241139	0.309845	0.323453		200	0.0658059	0.0727211	0.0591137		100	0.0342785	0.0282556	0.0338324		100	0.103802	0.0879642	0.106702		100	0.0901206	0.0983742	0.11042		50	0.057701	0.0815695	0.0581471		100	0.098746	0.102315	0.100754
	800	0.407178	0.373049	0.389333		600	0.46198	0.493432	0.407104		400	0.0901206	0.0927974	0.097705		200	0.051455	0.0503396	0.0429783		200	0.133248	0.13124	0.126779		200	0.151911	0.128266	0.144773		100	0.0822387	0.0889309	0.0777773		200	0.114584	0.118153	0.100084
	1500	0.487038	0.574035	0.53076		800	0.418258	0.418258	0.495663		600	0.112428	0.107743	0.100828		400	0.0764389	0.0875924	0.0668469		400	0.188123	0.215784	0.184554		400	0.128266	0.164626	0.157488		200	0.0949538	0.0927231	0.0853617		400	0.120161	0.113246	0.114361
	2000	0.621773	0.597458	0.634488		1000	0.542508	0.412235	0.502801		1000	0.119789	0.115105	0.111982		600	0.0902693	0.0826849	0.0873694		600	0.241214	0.212438	0.22783		600	0.182695	0.172211	0.180464		400	0.129307	0.143583	0.147598		600	0.144252	0.135107	0.129307
	3000	0.623111	0.692263	0.619096		2000	0.5637	0.611214	0.561915		1500	0.104397	0.107966	0.124027		1000	0.104546	0.0965153	0.0998613		1000	0.240098	0.239875	0.250583		1000	0.14968	0.165518	0.173326		600	0.123953	0.131091	0.151837		1000	0.133545	0.155852	0.147375
	4000	0.680663	0.729739	0.698286		3000	0.661405	0.567938	0.578869		3000	0.0988203	0.0854361	0.0968127		2000	0.112799	0.115476	0.119268		2000	0.236529	0.234076	0.21913		2000	0.199871	0.213479	0.200987		1000	0.157414	0.162544	0.160537		2000	0.162098	0.161875	0.153621
	Catalytic Parameters					Catalytic Parameters					Catalytic Parameters					Catalytic Parameters					Catalytic Parameters					Catalytic Parameters					Catalytic Parameters					Catalytic Parameters
	[WT NfsA]	0.8				[+R225D]	0.8				[+S41Y]	0.8				[+F227H]	0.8				[+T219Y]	0.8				[+H215N]	0.8				[+K222R]	0.8				[+S224Y]	0.8
	Catalytic Parameters from Prism					Catalytic Parameters from Prism					Catalytic Parameters from Prism					Catalytic Parameters from Prism					Catalytic Parameters from Prism					Catalytic Parameters from Prism					Catalytic Parameters from Prism					Catalytic Parameters from Prism
		Value	Error	Unit			Value	Error	Unit			Value	Error	Unit			Value	Error	Unit			Value	Error	Unit			Value	Error	Unit			Value	Error	Unit			Value	Error	Unit
	vmax	0.8933	0.0297			vmax	0.7057	0.03496			vmax	0.1196	0.005694			vmax	0.1338	0.00368			vmax	0.2722	0.008603			vmax	0.2	0.006			vmax	0.1674	0.007966			vmax	0.1569	0.004333
	kcat	0.8933	0.0297	s-1		kcat	0.7057	0.03496	s-1		kcat	0.1196	0.005694	s-1		kcat	0.1338	0.00368	s-1		kcat	0.2722	0.008603	s-1		kcat	0.2	0.006	s-1		kcat	0.1674	0.007966	s-1		kcat	0.1569	0.004333	s-1
	Km	1042	97.92	uM		Km	453.1	72.08	uM		Km	143.1	32.75	uM		Km	320.5	25.91	uM		Km	174.8	19.83	uM		Km	87	13	uM		Km	108.5	17.4	uM		Km	81.7	10.43	uM
	kcat/KM	0.000857294	8.53341e-05	uM-1.s-1		kcat/KM	0.00155749	0.000260818	uM-1.s-1		kcat/KM	0.000835779	0.000198146	uM-1.s-1		kcat/KM	0.000417473	3.50896e-05	uM-1.s-1		kcat/KM	0.00155721	0.000183673	uM-1.s-1		kcat/KM	0.00226	0.00035	uM-1.s-1		kcat/KM	0.00154286	0.000254077	uM-1.s-1		kcat/KM	0.00192044	0.000242902	uM-1.s-1
		857.294	85.3341	M-1.s-1			1557.49	260.818	M-1.s-1			835.779	198.146	M-1.s-1			417.473	35.0896	M-1.s-1			1557.21	183.673	M-1.s-1			2260	350	M-1.s-1			1542.86	254.077	M-1.s-1			1920.44	242.902	M-1.s-1
	*kcat/KM error calculated using					*kcat/KM error calculated using					*kcat/KM error calculated using					*kcat/KM error calculated using					*kcat/KM error calculated using					*kcat/KM error calculated using					*kcat/KM error calculated using					*kcat/KM error calculated using
	error propagation equation					error propagation equation					error propagation equation					error propagation equation					error propagation equation					error propagation equation					error propagation equation					error propagation equation
