# Supplementary material for: Intracellular complexities of acquiring a new enzymatic function revealed by mass-randomisation of active-site residues
Source: eLife. 2020 Nov 13;9:e59081. doi: 10.7554/eLife.59081 (PMC7738182; doi:10.7554/eLife.59081)
Supplement: Figure 5—source data 1. [file elife-59081-fig5-data1.xlsx]

## Sheet: Fig 5B
	36_37 Intermediates
	Metronidazole	Repeat 1	Repeat 2	Repeat 3	Repeat 4	EC50 Average	StDev	Error Ratio	Fold Activity	Adjusted Error
	WT NfsA	63.8	52.2	54.8	44.5	53.825	7.95922	0.147872	1	0.147872
	36_37_3 (+R225V)	10.4795	10.5989	11.8889	8.28095	10.3121	1.4969	0.14516	5.21962	0.75768
	36_37_64 (+S41Y)	6.76058	7.05682	9.28145	4.90409	7.00074	1.79428	0.256299	7.68848	1.97055
	36_37_80 (+T219Y)	4.67603	5.19205	7.7969	6.8487	6.12842	1.44786	0.236253	8.78285	2.07497
	36_37_79 (+F227G)	5.43141	5.69846	8.088	4.13832	5.83905	1.64684	0.282038	9.21811	2.59986
	36_37_83 (+S224R)	5.65121	5.99623	7.43018	4.62665	5.92607	1.15921	0.195613	9.08275	1.7767
	36_37_122 (+H215C)	5.0751	5.60557	7.27629	4.10884	5.51645	1.32679	0.240515	9.75718	2.34675
	36_37 (+K222V)	4.68208	3.10259	7.00214	3.91846	4.67632	1.67933	0.359114	11.5101	4.13345
	20_39 Intermediates
	Metronidazole	Repeat 1	Repeat 2	Repeat 3	Repeat 4	EC50 Average	StDev	Error Ratio	Fold Activity	Adjusted Error
	WT NfsA	47.5311	66.1	59.7	50.5	55.9578	8.51792	0.152221	1	0.152221
	20_39_118 (+R225D)	6.6	9.6	10.2	7.1	8.375	1.78955	0.213678	6.68153	1.42769
	20_39_85 (+S41Y)	8.1	12.0692	11	8.5	9.9173	1.92478	0.194083	5.64244	1.0951
	20_39_84 (+F227H)	5.7	8.9	9.6	6.5	7.675	1.86971	0.243611	7.29092	1.77615
	20_39_100 (+T219Y)	6.8	7.78694	9.9	7.9	8.09673	1.29974	0.160526	6.91115	1.10942
	20_39_74 (+H215N)	6.5	6.3	5.1	4.1	5.5	1.11952	0.20355	10.1741	2.07094
	20_39_124 (+K222R)	4.4	6.2	5.2	5.1	5.225	0.741058	0.141829	10.7096	1.51894
	20_39 (+S224Y)	6.8	5.8	5.2	4.5	5.575	0.974252	0.174754	10.0373	1.75405

## Sheet: Fig 5C
	36_37 Intermediates
	2,4-DNT	Repeat 1	Repeat 2	Repeat 3	Repeat 4	EC50 Average	StDev	Error Ratio	Fold Activity	Adjusted Error
	WT NfsA	398.404	405.867	343.02	355.375	375.667	31.1266	0.0828569	1	0.0828569
	36_37_3 (+R225V)	407.858	388.291	347.09	334.506	369.436	34.4055	0.0931298	1.01686	0.0947004
	36_37_64 (+S41Y)	295.203	282.656	261.079	296.543	283.87	16.4311	0.0578823	1.32337	0.0765999
	36_37_80 (+T219Y)	271.949	233.748	235.425	270.974	253.024	21.3044	0.0841992	1.48471	0.125011
	36_37_79 (+F227G)	214.02	224.656	218.872	258.03	228.894	19.9042	0.0869581	1.64122	0.142718
	36_37_83 (+S224R)	211.436	241.116	215.027	242.552	227.533	16.589	0.0729083	1.65104	0.120375
	36_37_122 (+H215C)	254.372	254.073	238.056	303.068	262.392	28.1683	0.107352	1.4317	0.153695
	36_37 (+K222V)	287.543	245.62	151.73	302.386	246.82	67.7978	0.274685	1.52203	0.418079
	20_39 Intermediates
	2,4-DNT	Repeat 1	Repeat 2	Repeat 3	Repeat 4	Repeat 5	Repeat 6	EC50 Average	StDev	Error Ratio	Fold Activity	Adjusted Error
	WT NfsA	454.098	361.063	406.482	395.954	352.333	299.415	378.224	53.0008	0.140131	1	0.140131
	20_39_118 (+R225D)	375.343	365.621	358.161	337.221	273.971	277.405	331.287	44.8677	0.135435	1.14168	0.154623
	20_39_85 (+S41Y)	287.319	387.075	320.519	307.6	253.479	290.892	307.814	44.95	0.14603	1.22874	0.179433
	20_39_84 (+F227H)	283.227	312.672	271.424	265.518	215.187	250.027	266.342	32.6837	0.122713	1.42007	0.174261
	20_39_100 (+T219Y)	271.347	317.199	276.944	227.236	242.322	258.183	265.539	31.2819	0.117805	1.42437	0.167798
	20_39_74 (+H215N)	281.122	286.268	250.1	227.502	194.29	244.671	247.326	34.2904	0.138645	1.52926	0.212023
	20_39_124 (+K222R)	255.065	318.759	276.031	284.745	249.733	253.175	272.918	26.4462	0.0969015	1.38585	0.134291
	20_39 (+S224Y)	383.752	280.393	257.122	273.808	240.848	269.429	284.225	50.7226	0.178459	1.33072	0.237479

## Sheet: Fig 5D
	36_37 Intermediates
	CB1954	Repeat 1	Repeat 2	Repeat 3	Repeat 4	EC50 Average	StDev	Error Ratio	Fold Activity	Adjusted Error
	WT NfsA	237.431	276.428	227.552	287.167	257.144	29.0834	0.113102	1	0.113102
	36_37_3 (+R225V)	129.587	161.806	126.282	159.709	144.346	19.0179	0.131752	1.78145	0.234709
	36_37_64 (+S41Y)	201.759	156.565	102.283	165.017	156.406	41.0707	0.262591	1.64409	0.431722
	36_37_80 (+T219Y)	176.445	150.936	118.409	146.521	148.078	23.7735	0.160548	1.73655	0.278799
	36_37_79 (+F227G)	211.606	130.224	125.689	166.03	158.387	39.8039	0.251307	1.62352	0.408002
	36_37_83 (+S224R)	202.191	149.101	117.138	152.122	155.138	35.1356	0.22648	1.65752	0.375394
	36_37_122 (+H215C)	225.04	132.551	127.249	191.169	169.002	47.2711	0.279707	1.52155	0.425587
	36_37 (+K222V)	225.185	139.55	102.105	167.378	158.554	51.8497	0.327016	1.62181	0.530357
	20_39 Intermediates
	CB1954	Repeat 1	Repeat 2	Repeat 3	Repeat 4	Repeat 5	Repeat 6	EC50 Average	StDev	Error Ratio	Fold Activity	Adjusted Error
	WT NfsA	219.784	301.408	237.4	272.976	242.886	307.099	263.592	35.902	0.136203	1	0.136203
	20_39_118 (+R225D)	100.539	147.485	163.211	149.674	105.336	171.694	139.656	29.836	0.213639	1.88743	0.403229
	20_39_85 (+S41Y)	129.266	200.671	183.993	172.132	145.81	206.702	173.096	30.5775	0.176651	1.52281	0.269007
	20_39_84 (+F227H)	132.36	169.918	178.655	161.362	165.177	179.545	164.503	17.3168	0.105268	1.60236	0.168677
	20_39_100 (+T219Y)	131.443	168.553	167.533	180.48	125.919	154.093	154.67	21.8668	0.141377	1.70422	0.240938
	20_39_74 (+H215N)	132.815	145.054	130.1	144.6	125.611	125.633	133.969	8.84928	0.0660547	1.96756	0.129967
	20_39_124 (+K222R)	98.8404	147.011	170.737	130.899	95.4066	138.598	130.249	28.9513	0.222277	2.02376	0.449835
	20_39 (+S224Y)	161.079	131.001	188.987	117.104	99.074	120.372	136.27	32.9422	0.241743	1.93434	0.467613

## Sheet: Fig 5E
	36_37 Intermediates
	RB6145	Repeat 1	Repeat 2	Repeat 3	Repeat 4	EC50 Average	StDev	Error Ratio	Fold Activity	Adjusted Error
	WT NfsA	17.1753	21.1982	20.3348	11.2677	17.494	4.49666	0.25704	1	0.25704
	36_37_3 (+R225V)	21.3634	20.3554	24.9607	15.7612	20.6102	3.78912	0.183847	0.848804	0.15605
	36_37_64 (+S41Y)	13.803	16.5555	15.2155	9.95756	13.8829	2.848	0.205144	1.26011	0.258505
	36_37_80 (+T219Y)	14.5665	13.69	18.403	10.3394	14.2497	3.31429	0.232586	1.22767	0.28554
	36_37_79 (+F227G)	16.7768	19.2376	19.9932	12.1042	17.0279	3.55817	0.208961	1.02737	0.21468
	36_37_83 (+S224R)	16.249	18.3581	16.9642	12.5064	16.0194	2.50039	0.156085	1.09205	0.170453
	36_37_122 (+H215C)	14.6168	15.6404	15.861	9.27187	13.8475	3.09822	0.223738	1.26333	0.282655
	36_37 (+K222V)	15.5013	10.0444	18.6596	10.0174	13.5557	4.26942	0.314954	1.29053	0.406457
	20_39 Intermediates
	RB6145	Repeat 1	Repeat 2	Repeat 3	Repeat 4	Repeat 5	EC50 Average	StDev	Error Ratio	Fold Activity	Adjusted Error
	WT NfsA	16.7693	22.0421	21.1548	17.1308	16.811	18.7816	2.59425	0.138127	1	0.138127
	20_39_118 (+R225D)	21.4378	24.8508	22.1976	16.1935	19.3084	20.7976	3.24861	0.156201	0.903066	0.14106
	20_39_85 (+S41Y)	12.7161	17.8344	18.2115	13.8727	14.9046	15.5079	2.42663	0.156477	1.2111	0.18951
	20_39_84 (+F227H)	16.0806	19.6453	20.687	14.2187	15.2069	17.1677	2.83931	0.165387	1.09401	0.180935
	20_39_100 (+T219Y)	17.184	26.8845	23.4203	21.2109	17.2462	21.1892	4.15341	0.196016	0.886378	0.173744
	20_39_74 (+H215N)	24.0736	20	20.9607	16.1794	20.0392	20.2506	2.81967	0.139239	0.92746	0.129138
	20_39_124 (+K222R)	16.2222	22.8432	20.131	17.7111	18.8005	19.1416	2.51826	0.131559	0.981193	0.129085
	20_39 (+S224Y)	16.2705	20.4299	20.3253	16.8942	17.6773	18.3194	1.94419	0.106127	1.02523	0.108805

## Sheet: Fig 5F
	36_37 Intermediates
	Nitrofurazone	Repeat 1	Repeat 2	Repeat 3	Repeat 4	EC50 Average	StDev	Error Ratio	Fold Activity	Adjusted Error
	WT NfsA	66.4044	68.6893	59.8179	56.6442	62.889	5.61042	0.0892116	1	0.0892116
	36_37_3 (+R225V)	69.049	68.1975	54.565	57.7904	62.4004	7.31334	0.1172	1.00783	0.118118
	36_37_64 (+S41Y)	50.8868	63.9443	53.4805	49.1115	54.3558	6.63933	0.122146	1.15699	0.141321
	36_37_80 (+T219Y)	60.2126	62.6994	50.866	52.4427	56.5552	5.78525	0.102294	1.11199	0.11375
	36_37_79 (+F227G)	56.8194	66.4132	65.1352	62.9986	62.8416	4.25471	0.0677053	1.00075	0.0677563
	36_37_83 (+S224R)	68.2625	67.8911	65.9751	56.9399	64.7672	5.31358	0.0820413	0.971001	0.0796621
	36_37_122 (+H215C)	61.7733	58.1106	47.6354	48.2338	53.9383	7.09609	0.131559	1.16594	0.153391
	36_37 (+K222V)	53.9153	57.1635	25.2581	50.4648	46.7004	14.5542	0.311651	1.34665	0.419683
	20_39 Intermediates
	Nitrofurazone	Repeat 1	Repeat 2	Repeat 3	Repeat 4	Repeat 5	Repeat 6	Repeat 7	EC50 Average	StDev	Error Ratio	Fold Activity	Adjusted Error
	WT NfsA	49.437	46.9365	52.9	64.2175	62.1909	53.5941	50.248	54.2177	6.54883	0.120788	1	0.120788
	20_39_118 (+R225D)	41.3312	46.6393	71.9053	56.4845	50.0997	43.3939	44.2607	50.5878	10.6654	0.21083	1.07175	0.225958
	20_39_85 (+S41Y)	37.7601	38.7895	60.1229	54.1555	54.4632	45.3593	45.643	48.0419	8.45412	0.175974	1.12855	0.198595
	20_39_84 (+F227H)	42.7693	41.2361	66.9951	64.2299	58.3967	47.6996	49.1992	52.9323	10.301	0.194607	1.02428	0.199333
	20_39_100 (+T219Y)	44.6203	47.2002	59.6641	73.0277	68.7335	67.3429	54.8177	59.3438	10.9867	0.185136	0.913621	0.169144
	20_39_74 (+H215N)	54.2482	46.2234	50.1	52	53.813	45.796	54.3041	50.9264	3.67536	0.0721701	1.06463	0.0768344
	20_39_124 (+K222R)	32.3609	49.3603	48.4474	54.8407	50.4716	47.4315	43.7874	46.6714	7.13268	0.152828	1.16169	0.177538
	20_39 (+S224Y)	36.8032	42.115	66.2843	49.1775	49.8129	46.7216	51.7018	48.9452	9.20213	0.188009	1.10772	0.208262
