# Supplementary material for: Intracellular complexities of acquiring a new enzymatic function revealed by mass-randomisation of active-site residues
Source: eLife. 2020 Nov 13;9:e59081. doi: 10.7554/eLife.59081 (PMC7738182; doi:10.7554/eLife.59081)
Supplement: Source data 1. [file elife-59081-data1.xlsx]

## Sheet: Supplementary CAM growth inhibi
		Three biological replicates of E. coli growth (%) at indicated chloramphenicol challenge concentration relative to unchallenged replicate over 4 hrs
			LOW						MED						HIGH
		7.5 uM_1	7.5 uM_2	7.5 uM_3				15 uM_1	15 uM_1	15 uM_1				30 uM_1	30 uM_2	30 uM_3
	Empty	-3.70772	-8.78132	-5.30436			Empty	-3.11436	-9.65544	-2.02322			Empty	-3.86208	-1.85131	-4.75897
	Empty	-4.15041	-7.76678	0.23246			Empty	-1.08225	-3.38077	-4.09975			Empty	-3.65908	-2.13882	-6.93153
	WT	13.9933	29.0527	24.031			WT	5.14927	28.7335	45.1377			WT	-5.66359	-3.83972	37.797
	WT	20.8194	25.4653	40.5665			WT	1.76415	24.29	43.1758			WT	-6.26192	-4.15849	41.4613
	WT	22.5533	29.135	47.6456			WT	1.85176	10.5443	25.5618			WT	-5.77779	-5.61249	-2.29945
	WT	16.6402	25.4681	47.8833			WT	6.98645	8.5102	36.9268			WT	-6.62559	-3.22041	0.610811
	20_39	98.5461	94.6982	100.475			20_39	95.1414	89.4533	98.0255			20_39	68.9317	72.2303	80.963
	20_39	87.1553	96.9863	88.4312			20_39	86.1664	90.8695	92.843			20_39	64.1949	77.6899	75.796
	36_37	91.9797	83.3595	91.1031			36_37	85.7363	76.8577	91.4166			36_37	70.4163	66.248	69.7878
	36_37	97.6692	89.6125	86.448			36_37	95.8459	83.7903	85.9045			36_37	76.0526	69.7558	69.811
	ep_1	78.5895	86.559	92.5773			ep_1	59.8835	79.3368	87.4178			ep_1	35.6133	38.7506	78.9864
	ep_2	81.1905	85.2915	94.9979			ep_2	64.5796	85.1963	97.7052			ep_2	32.4374	48.0015	86.546
	ep_3	76.394	87.3512	91.3143			ep_3	59.2937	79.0324	101.089			ep_3	34.5725	44.8895	80.3057
	ep_4	93.0153	89.1403	88.736			ep_4	70.1748	88.2353	79.1193			ep_4	41.5632	48.6425	72.9524
	ep_5	92.5872	103.585	100.535			ep_5	82.037	97.153	97.6881			ep_5	53.1203	71.098	89.7937
	ep_6	88.9804	90.3193	92.5254			ep_6	68.4389	84.3885	91.8408			ep_6	36.0676	47.5108	92.0494
	ep_7	88.252	87.6313	99.4872			ep_7	68.7608	83.914	95.3726			ep_7	41.8151	41.6044	91.4583
	ep_8	79.6428	88.4212	95.6322			ep_8	59.6392	80.389	95.7939			ep_8	25.4531	42.6541	87.0009
	ep_9	83.43	94.4514	90.6155			ep_9	58.302	85.352	90.8101			ep_9	26.7517	53.3954	77.2607
	ep_10	80.377	83.5159	88.9824			ep_10	57.8865	74.5246	79.996			ep_10	28.8129	39.3178	76.7716
	ep_11	90.7485	89.9778	90.9785			ep_11	75.352	82.9887	90.3669			ep_11	41.7483	43.3356	73.3953
	ep_12	82.6601	87.08	83.3913			ep_12	66.3916	84.8238	91.1594			ep_12	35.1293	43.1609	72.3037
	ep_13	77.376	88.8927	94.6007			ep_13	58.2025	79.2891	96.732			ep_13	29.9234	43.7799	74.5169
	ep_14	83.3446	91.9955	93.4988			ep_14	69.4092	80.3251	81.2792			ep_14	43.9076	56.3986	83.6596
	ep_15	75.7491	78.7736	80.7471			ep_15	62.1588	75.8656	80.4023			ep_15	29.2583	34.9105	53.2312
	ep_16	84.7419	82.7567	92.9107			ep_16	68.7802	73.0909	91.3676			ep_16	31.9808	39.7105	61.7145
	ep_17	85.3688	85.4266	93.2156			ep_17	69.3247	79.6971	88.6262			ep_17	36.3805	39.5469	72.4367
	ep_18	89.3199	90.724	87.2551			ep_18	76.4356	83.7124	86.2998			ep_18	43.4672	49.9966	72.2852
	ep_19	74.7531	85.3295	82.0088			ep_19	51.3538	79.1096	79.5991			ep_19	24.6904	40.9476	43.6869
	ep_20	91.2244	98.2286	94.3553			ep_20	72.0969	81.2738	89.1435			ep_20	44.8679	59.0977	80.4495
	ep_21	80.3686	83.5844	95.3095			ep_21	64.6689	75.0107	99.0786			ep_21	30.3866	33.6966	59.8858
	ep_22	77.4228	82.7535	92.6108			ep_22	59.5839	74.3347	82.7911			ep_22	28.1392	37.5781	68.0558
	ep_23	80.745	85.83	88.69			ep_23	59.57	71.0526	85.2804			ep_23	25.7329	41.498	58.2439
	ep_24	64.8453	77.206	89.4192			ep_24	40.4303	60.4104	71.1111			ep_24	15.0046	26.4328	50.505
	ep_25	84.2202	82.2127	89.3379			ep_25	67.1553	69.3015	88.4306			ep_25	32.9549	37.0558	55.1646
	ep_26	83.3189	91.5785	96.9069			ep_26	72.1341	78.0178	97.7192			ep_26	42.8969	51.0728	61.8227
	ep_27	79.7401	79.172	90.7839			ep_27	68.5745	71.859	91.4368			ep_27	35.088	33.3227	59.1404
	ep_28	74.8252	73.0753	84.1406			ep_28	64.6125	68.9213	87.0512			ep_28	29.56	34.2283	41.9858
	ep_29	71.2641	81.4379	76.8422			ep_29	55.4077	80.2958	77.0897			ep_29	26.1142	31.7727	32.1355
	ep_30	76.2916	87.01	95.8881			ep_30	63.3965	74.0093	95.3808			ep_30	31.9569	41.9271	69.2009
	ep_31	81.5407	82.9678	89.155			ep_31	72.2726	72.9613	87.4593			ep_31	36.0125	30.1522	46.9136
	ep_32	77.6303	80.9689	84.3698			ep_32	61.6008	76.8576	78.8269			ep_32	29.0711	35.7158	49.642
	ep_33	76.7527	84.8292	98.2707			ep_33	57.4934	77.4699	89.7079			ep_33	28.2341	37.2817	50.8776
	ep_34	18.1255	28.8538	45.3625			ep_34	3.41297	8.81526	39.4666			ep_34	-4.52051	-5.01044	9.75784
	ep_35	84.8772	81.3716	90.3135			ep_35	68.2527	71.7197	88.0072			ep_35	34.9597	46.7458	57.6787
	ep_36	79.6104	81.8276	82.0399			ep_36	70.6439	78.727	89.4956			ep_36	40.5861	53.4705	49.7348
	ep_37	28.4585	31.0602	43.038			ep_37	9.95257	15.2289	40.343			ep_37	-4.55336	-4.00562	1.29667
	ep_38	74.4691	84.9891	85.1298			ep_38	55.2767	77.8216	84.7853			ep_38	24.8461	38.7751	53.2193
	ep_39	85.4445	104.47	90.2917			ep_39	59.8474	95.1593	80.9336			ep_39	25.0762	55.3619	51.7463
	ep_40	77.91	85.4179	82.0346			ep_40	60.7077	71.6848	83.3333			ep_40	35.3541	42.8335	51.7316
	ep_41	84.369	83.4872	83.6445			ep_41	65.3868	69.7837	81.3811			ep_41	38.7655	38.631	55.0136
	ep_42	76.6744	77.9888	88.1676			ep_42	61.1228	65.9505	85.7672			ep_42	30.5726	39.3079	53.9261
	ep_43	81.659	84.1657	84.1429			ep_43	62.811	72.1109	79.3085			ep_43	32.4762	43.1572	53.9553
	ep_44	74.4537	80.9962	90.5035			ep_44	0.338983	37.4002	61.0068			ep_44	11.2596	14.748	41.5779
	ep_45	86.1984	82.0717	93.5385			ep_45	67.3809	69.5219	90.9532			ep_45	41.9682	41.8327	61.9464
	ep_46	85.7692	83.5173	95.7603			ep_46	72.5051	70.7052	91.9931			ep_46	39.1088	46.1848	64.9873
	ep_47	82.5204	84.2133	91.6834			ep_47	63.7478	73.7486	92.5731			ep_47	41.9037	44.5483	47.0657
	ep_48	87.4254	87.3242	91.9048			ep_48	71.4601	80.0921	84.3254			ep_48	41.3462	50.7579	60.5423
	ep_49	78.0825	77.4078	78.5725			ep_49	61.2079	65.6775	76.5173			ep_49	28.9661	36.5942	39.9211
	ep_50	82.4914	83.7382	87.975			ep_50	60.2825	70.0808	83.3406			ep_50	29.63	37.9231	64.84
