# Supplementary material for: Intracellular complexities of acquiring a new enzymatic function revealed by mass-randomisation of active-site residues
Source: eLife. 2020 Nov 13;9:e59081. doi: 10.7554/eLife.59081 (PMC7738182; doi:10.7554/eLife.59081)
Supplement: Table 1—source data 1. [file elife-59081-table1-data1.xlsx]

## Sheet: Table 1 (CM Data)
	19_22							20_39							36_3							37_4							36_37							WT NfsA
	Raw Data							Raw Data							Raw Data							Raw Data							Raw Data							Raw Data
	0	0.000232	0.000251	0.000194				0	0.000357	0.00034	0.00033				0	0.000155	0.000139	0.000148				0	0.00022	0.000266	0.000214				0	0.0003	0.000289	0.000275				0	0.00117	0.001378	0.001237
	50	0.000451	0.000421	0.000415				50	0.000593	0.000582	0.000564				50	0.000296	0.000288	0.000302				50	0.000373	0.000346	0.00039				50	0.00046	0.000457	0.0004				100	0.001567	0.001541	0.001511
	100	0.000571	0.000571	0.000564				100	0.000785	0.000801	0.000794				100	0.000377	0.000378	0.000383				100	0.000428	0.000484	0.000466				100	0.00055	0.000563	0.00055				400	0.002317	0.002473	0.002164
	200	0.000609	0.00057	0.000593				200	0.000856	0.000872	0.000791				200	0.000457	0.000416	0.000447				200	0.000492	0.000494	0.000526				200	0.000722	0.000693	0.000739				800	0.003087	0.002934	0.003007
	400	0.000715	0.000692	0.000692				400	0.000881	0.00085	0.000855				400	0.000476	0.000501	0.00048				400	0.000574	0.000617	0.000561				400	0.000677	0.000673	0.000772				1500	0.003445	0.003835	0.003641
	600	0.00073	0.00078	0.000767				600	0.000989	0.000948	0.000922				600	0.000521	0.000525	0.000554				600	0.000504	0.000497	0.000561				600	0.000821	0.00082	0.00081				2000	0.004049	0.00394	0.004106
	1000	0.000767	0.000807	0.0008				1000	0.000941	0.001041	0.001003				1000	0.00058	0.000593	0.000626				1000	0.000517	0.000574	0.00057				1000	0.000856	0.00087	0.000876				3000	0.004055	0.004365	0.004037
	2000	0.000752	0.000754	0.000777				2000	0.001069	0.001068	0.001031				2000	0.000635	0.000588	0.000627				2000	0.000635	0.000689	0.000622				2000	0.000839	0.000835	0.000852				4000	0.004313	0.004533	0.004392
	Adjusted for Pathlength and Extinction Coefficient							Adjusted for Pathlength and Extinction Coefficient							Adjusted for Pathlength and Extinction Coefficient							Adjusted for Pathlength and Extinction Coefficient							Adjusted for Pathlength and Extinction Coefficient							Adjusted for Pathlength and Extinction Coefficient
	0	0.0414019	0.0447926	0.0346206				0	0.063709	0.0606752	0.0588907				0	0.0276608	0.0248055	0.0264116				0	0.0392605	0.0474695	0.0381897				0	0.053537	0.051574	0.0490756				0	0.208794	0.245913	0.220751
	50	0.0804839	0.0751302	0.0740595				50	0.105825	0.103862	0.10065				50	0.0528232	0.0513955	0.0538939				50	0.0665643	0.061746	0.0695981				50	0.08209	0.0815547	0.0713826				100	0.279641	0.275002	0.269648
	100	0.101899	0.101899	0.10065				100	0.140088	0.142944	0.141695				100	0.0672781	0.0674566	0.0683489				100	0.0763794	0.086373	0.0831608				100	0.0981511	0.100471	0.0981511				400	0.413484	0.441323	0.38618
	200	0.10868	0.10172	0.105825				200	0.152759	0.155614	0.141159				200	0.0815547	0.0742379	0.0797701				200	0.0878006	0.0881576	0.0938682				200	0.128846	0.12367	0.131879				800	0.550895	0.523592	0.536619
	400	0.127596	0.123492	0.123492				400	0.15722	0.151688	0.15258				400	0.0849453	0.0894068	0.0856592				400	0.102434	0.110108	0.100114				400	0.120815	0.120101	0.137768				1500	0.614783	0.684381	0.64976
	600	0.130273	0.139196	0.136876				600	0.176494	0.169177	0.164537				600	0.0929759	0.0936897	0.098865				600	0.0899421	0.0886929	0.100114				600	0.146513	0.146334	0.14455				2000	0.722571	0.703119	0.732743
	1000	0.136876	0.144014	0.142765				1000	0.167928	0.185773	0.178992				1000	0.103505	0.105825	0.111714				1000	0.0922621	0.102434	0.10172				1000	0.152759	0.155257	0.156328				3000	0.723641	0.778963	0.720429
	2000	0.134199	0.134556	0.138661				2000	0.19077	0.190592	0.183989				2000	0.11332	0.104932	0.111892				2000	0.11332	0.122957	0.111				2000	0.149725	0.149011	0.152045				4000	0.769683	0.808944	0.783781
	Normalised to 0 uM							Normalised for 0 uM							Normalised for 0 uM							Normalised for 0 uM							Normalised for 0 uM							Normalised for 0 uM
	0	0.00113023	0.0045209	-0.00565113				0	0.00261736	-0.000416399	-0.00220096				0	0.00136817	-0.00148714	0.000118971				0	-0.00237942	0.00582958	-0.00345016				0	0.00214148	0.000178457	-0.00231994				0	-0.0163585	0.0207605	-0.00440193
	50	0.0402122	0.0348585	0.0337878				50	0.0447331	0.0427701	0.0395579				50	0.0265305	0.0251029	0.0276013				50	0.0249244	0.0201061	0.0279582				50	0.0306945	0.0301592	0.0199871				100	0.0544887	0.0498489	0.0444952
	100	0.061627	0.061627	0.0603778				100	0.0789968	0.0818521	0.0806029				100	0.0409855	0.041164	0.0420563				100	0.0347395	0.0447331	0.0415209				100	0.0467556	0.0490756	0.0467556				400	0.188331	0.21617	0.161027
	200	0.0684084	0.0614486	0.0655531				200	0.0916672	0.0945225	0.0800675				200	0.0552621	0.0479453	0.0534775				200	0.0461608	0.0465177	0.0522283				200	0.0774502	0.0722749	0.0804839				800	0.325743	0.298439	0.311466
	400	0.0873248	0.0832203	0.0832203				400	0.0961286	0.0905965	0.0914887				400	0.0586527	0.0631141	0.0593666				400	0.0607942	0.0684678	0.0584743				400	0.0694196	0.0687058	0.086373				1500	0.38963	0.459228	0.424608
	600	0.0900016	0.0989244	0.0966045				600	0.115402	0.108085	0.103445				600	0.0666833	0.0673971	0.0725723				600	0.0483023	0.0470531	0.0584743				600	0.0951174	0.0949389	0.0931543				2000	0.497418	0.477966	0.50759
	1000	0.0966045	0.103743	0.102494				1000	0.106836	0.124682	0.1179				1000	0.0772122	0.0795322	0.0854212				1000	0.0506222	0.0607942	0.0600804				1000	0.101363	0.103862	0.104932				3000	0.498489	0.55381	0.495277
	2000	0.0939277	0.0942846	0.0983891				2000	0.129678	0.1295	0.122897				2000	0.0870273	0.0786399	0.0855997				2000	0.0716801	0.0813167	0.0693601				2000	0.0983296	0.0976158	0.10065				4000	0.544531	0.583791	0.558629
	Normalised for [Enzmye]							Normalised for [Enzmye]							Normalised for [Enzmye]							Normalised for [Enzmye]							Normalised for [Enzmye]							Normalised for [Enzmye]
	Prism Input							Prism Input							Prism Input							Prism Input							Prism Input							Prism Input
	0	0.00141278	0.00565113	-0.00706391				0	0.0032717	-0.000520498	-0.00275121				0	0.00171021	-0.00185892	0.000148714				0	-0.00297428	0.00728698	-0.0043127				0	0.000267685	2.23071e-05	-0.000289992				0	-0.0204482	0.0259506	-0.00550241
	50	0.0502653	0.0435732	0.0422347				50	0.0559164	0.0534626	0.0494473				50	0.0331632	0.0313786	0.0345016				50	0.0311555	0.0251326	0.0349477				50	0.00383682	0.0037699	0.00249839				100	0.0681109	0.0623111	0.055619
	100	0.0770338	0.0770338	0.0754723				100	0.098746	0.102315	0.100754				100	0.0512319	0.051455	0.0525703				100	0.0434244	0.0559164	0.0519011				100	0.00584445	0.00613445	0.00584445				400	0.235414	0.270213	0.201284
	200	0.0855105	0.0768107	0.0819413				200	0.114584	0.118153	0.100084				200	0.0690776	0.0599317	0.0668469				200	0.057701	0.0581471	0.0652854				200	0.00968127	0.00903436	0.0100605				800	0.407178	0.373049	0.389333
	400	0.109156	0.104025	0.104025				400	0.120161	0.113246	0.114361				400	0.0733159	0.0788927	0.0742082				400	0.0759928	0.0855848	0.0730928				400	0.00867745	0.00858822	0.0107966				1500	0.487038	0.574035	0.53076
	600	0.112502	0.123656	0.120756				600	0.144252	0.135107	0.129307				600	0.0833541	0.0842464	0.0907154				600	0.0603778	0.0588163	0.0730928				600	0.0118897	0.0118674	0.0116443				2000	0.621773	0.597458	0.634488
	1000	0.120756	0.129678	0.128117				1000	0.133545	0.155852	0.147375				1000	0.0965153	0.0994152	0.106777				1000	0.0632777	0.0759928	0.0751005				1000	0.0126704	0.0129827	0.0131166				3000	0.623111	0.692263	0.619096
	2000	0.11741	0.117856	0.122986				2000	0.162098	0.161875	0.153621				2000	0.108784	0.0982998	0.107				2000	0.0896001	0.101646	0.0867002				2000	0.0122912	0.012202	0.0125812				4000	0.680663	0.729739	0.698286
	Concentration							Concentration							Catalytic Parameters							Catalytic Parameters							Catalytic Parameters							Catalytic Parameters
	[19_22] in reaction	0.8						[20_39] in reaction	0.8						[36_3] in reaction	0.8						[37_4] in reaction	0.8						[36_37]	8						[WT NfsA]	0.8
	Catalytic Parameters from Prism							Catalytic Parameters from Prism							Catalytic Parameters from Prism							Catalytic Parameters from Prism							Catalytic Parameters from Prism							Catalytic Parameters from Prism
		Value	Error	Unit					Value	Error	Unit					Value	Error	Unit					Value	Error	Unit					Value	Error	Unit					Value	Error	Unit
	vmax	0.1308	0.002989					vmax	0.1569	0.004333					vmax	0.1086	0.002511					vmax	0.08558	0.003833					vmax	0.1376	0.004345					vmax	0.8933	0.0297
	kcat	0.1308	0.002989	s-1				kcat	0.1569	0.004333	s-1				kcat	0.1086	0.002511	s-1				kcat	0.08558	0.003833	s-1				kcat	0.1376	0.004345	s-1				kcat	0.8933	0.0297	s-1
	Km	88.74	9.103	uM				Km	81.7	10.43	uM				Km	127.1	11.7	uM				Km	82.01	16.95	uM				Km	125.1	15.81	uM				Km	1042	97.92	uM
	kcat/KM	0.00147397	0.000151506	uM-1.s-1				kcat/KM	0.00192044	0.000242902	uM-1.s-1				kcat/KM	0.000854445	8.51811e-05	uM-1.s-1				kcat/KM	0.00104353	0.000232713	uM-1.s-1				kcat/KM	0.00109992	0.000146888	uM-1.s-1				kcat/KM	0.000857294	8.53341e-05	uM-1.s-1
		1473.97	151.506	M-1.s-1					1920.44	242.902	M-1.s-1					854.445	85.1811	M-1.s-1					1043.53	232.713	M-1.s-1					1099.92	146.888	M-1.s-1					857.294	85.3341	M-1.s-1
	*kcat/KM error calculated using							*kcat/KM error calculated using							*kcat/KM error calculated using							*kcat/KM error calculated using							*kcat/KM error calculated using							*kcat/KM error calculated using
	error propagation equation							error propagation equation							error propagation equation							error propagation equation							error propagation equation							error propagation equation

## Sheet: Table 1 (Quinone Data)
								Rate Adjusted for Background			Rate Adjusted [Enzyme] Pathlength
		[Reaction]	Repeat 1	Repeat 2	Repeat 3	Rate No Enzyme	Rate No Quinone	1	2	3	1	2	3	Average Rate	StDev	Fold Activity
	WT NfsA	0.08	0.002414	0.002645	0.002496	0.00039	0.000112	0.0239	0.0267875	0.024925	8.53023	9.56081	8.89606	8.9957	0.522468	1
	36_37	0.8	0.000963	0.000889	0.000878	0.00039	0.000672	-0.00012375	-0.00021625	-0.00023	-0.044168	-0.0771825	-0.08209	-0.0678135	0.0206241	-0.00753844
	20_39	0.8	0.000766	0.000739	0.000684	0.00039	0.00044	-8e-05	-0.00011375	-0.0001825	-0.0285531	-0.0405989	-0.0651367	-0.0447629	0.0186439	N.D less than 0.1
	36_3	0.8	0.0012	0.00113	0.001116	0.000325	0.000562	0.00039125	0.00030375	0.00028625	0.139642	0.108412	0.102166	0.11674	0.020078
	37_4	0.8	0.00079	0.00075	0.000816	0.000325	0.00041	6.875e-05	1.875e-05	0.00010125	0.0245378	0.00669212	0.0361375	0.0224558	0.0148327
	19_22	0.8	0.00085	0.00079	0.000863	0.000325	0.000393	0.000165	9e-05	0.00018125	0.0588907	0.0321222	0.0646905	0.0519011	0.0173728
